1 ***Arabidopsis* PROTODERMAL FACTOR2 binds lysophosphatidylcholines and**  
2 **transcriptionally regulates phospholipid metabolism**

3 Izabela Wojciechowska,<sup>a</sup> Thiya Mukherjee,<sup>b,c,d</sup> Patrick Knox-Brown,<sup>d</sup> Xueyun Hu,<sup>b,e</sup>  
4 Aashima Khosla,<sup>b,c,f</sup> Graham L. Mathews,<sup>b</sup> Kyle A. Thompson,<sup>b</sup> Seth T. Peery,<sup>b</sup> Jagoda  
5 Szlachetko,<sup>a</sup> Anja Thalhammer,<sup>e</sup> Dirk K. Hinch,<sup>a,†</sup> Aleksandra Skirydz,<sup>a,g,1</sup> Kathrin  
6 Schrick<sup>b,c,1</sup>

7 <sup>a</sup> Max Planck Institute of Molecular Plant Physiology, 14476 Potsdam, Germany

8 <sup>b</sup> Division of Biology, Kansas State University, Manhattan, KS 66506, USA

9 <sup>c</sup> Molecular, Cellular and Developmental Biology, Kansas State University, Manhattan,  
10 KS 66506, USA

11 <sup>d</sup> Donald Danforth Plant Science Center, Olivette, MO 63132, USA

12 <sup>e</sup> Physical Biochemistry, University of Potsdam, 14476 Potsdam, Germany

13 <sup>f</sup> Joint International Research Laboratory of Agriculture and Agri-Product Safety of  
14 Ministry of Education of China, Yangzhou University, Yangzhou 225009, PR China

15 <sup>g</sup> Department of Botany and Plant Sciences, University of California, Riverside, CA  
16 92521, USA

17 <sup>h</sup> Boyce Thompson Institute, Cornell University, Ithaca, NY 14853, USA

18 <sup>†</sup> submission posthumously

19

20 <sup>1</sup> Address correspondence to co-corresponding authors: [kschrick@ksu.edu](mailto:kschrick@ksu.edu) (Kathrin  
21 Schrick) and [as4258@cornell.edu](mailto:as4258@cornell.edu) (Aleksandra Skirydz)

22 The author responsible for distribution of materials integral to the findings presented in  
23 this article in accordance with the policy described in the Instructions for Authors  
24 ([www.plantcell.org](http://www.plantcell.org)) is: Kathrin Schrick ([kschrick@ksu.edu](mailto:kschrick@ksu.edu)).

25

26 **Short title: PDF2 binds lysophospholipids and regulates lipid metabolism**

27 **ABSTRACT**

28 Plant homeodomain leucine-zipper IV (HD-Zip IV) transcription factors (TFs) contain an  
29 evolutionarily conserved steroidogenic acute regulatory protein (StAR)-related lipid  
30 transfer (START) domain. The START domain is required for TF activity; however, its  
31 presumed role as a lipid sensor is not well understood. Here we used tandem affinity  
32 purification from *Arabidopsis* cell cultures to demonstrate that PROTODERMAL  
33 FACTOR2 (PDF2), a representative family member which controls epidermal  
34 differentiation, recruits lysophosphatidylcholines in a START-dependent manner. *In vitro*  
35 assays with recombinant protein verified that a missense mutation in a predicted ligand  
36 contact site reduces lysophospholipid binding. We additionally uncovered that PDF2  
37 controls the expression of phospholipid-related target genes by binding to a palindromic  
38 octamer with consensus to a phosphate (Pi) response element. Phospholipid  
39 homeostasis and elongation growth were altered in *pdf2* mutants according to Pi  
40 availability. Cycloheximide chase experiments further revealed a role for START in  
41 maintaining protein levels, and Pi limitation resulted in enhanced protein destabilization,  
42 suggesting a mechanism by which lipid binding controls TF activity. We propose that the  
43 START domain serves as a molecular sensor for membrane phospholipid status in the  
44 epidermis. Overall our data provide insights towards understanding how the lipid  
45 metabolome integrates Pi availability with gene expression.

46

47

48

49

50

51

52

53

54

55

56

57

58

## 59 INTRODUCTION

60 Interactions between lipids and proteins are dynamic in living organisms, yet the full  
61 extent and biological significance of such interactions is underexplored, especially in  
62 plants. In *Arabidopsis*, 21 homeodomain leucine-zipper transcription factors of the class  
63 III and IV families (HD-Zip TFs III and IV) contain a putative lipid sensor named START  
64 (Schrick et al., 2004). The steroidogenic acute regulatory protein (StAR)-related lipid-  
65 transfer (START) domain was first characterized in mammalian proteins involved in lipid  
66 transfer, metabolism and sensing (Ponting and Aravind, 1999; Alpy and Tomasetto,  
67 2005). In humans, the START domain is found in 15 proteins, several of which are  
68 known to bind specific sterols, bile acids, phospholipids, sphingolipids, or steroid  
69 hormones (Alpy et al., 2009; Letourneau et al., 2012; Letourneau et al., 2015; Clark,  
70 2020). Homology modeling of START domains across *Arabidopsis* HD-Zip TFs  
71 suggests that plant proteins contain a similar ligand-binding pocket (Schrick et al.,  
72 2014). In accordance, deletion of this domain from HD-Zip TF IV member GLABRA2  
73 (GL2, AT1G79840) results in loss-of-function phenotypes that are partially  
74 complemented by the START domain from mammalian STARD1/StAR (Schrick et al.,  
75 2014). The observed complementation is abolished by a binding-site mutation, implying  
76 importance of ligand binding for GL2 function. Moreover, START domains from HD-Zip  
77 IV TFs PROTODERMAL FACTOR2 (PDF2, AT4G04890) and *Arabidopsis thaliana*  
78 MERISTEM LAYER1 (ATML1, AT4G21750), promote transcriptional activity of a  
79 chimeric TF in yeast (Schrick et al., 2014).

80 PDF2 and its paralog ATML1 are thought to be functionally redundant and play a  
81 critical role in maintenance of epidermal (L1) identity of the vegetative, floral and  
82 inflorescence shoot apical meristem (Abe et al., 2003). Double knockout mutants of  
83 *PDF2* and *ATML1* result in severe defects in shoot epidermal cell differentiation,  
84 resulting in embryonic lethality (Ogawa et al., 2015), while overexpression of *ATML1* is  
85 sufficient to induce epidermal identity in internal cell layers (Takada et al., 2013).  
86 Moreover, double mutants of *PDF2* with other family members (*HDG1*, *HDG2*, *HDG5*,  
87 *HDG12*), result in floral organ defects (Kamata et al., 2013a). ATML1 and PDF2 TFs  
88 bind to the L1 box, a promoter element specific to L1 genes such as those coding for  
89 extracellular proline-rich protein PROTODERMAL FACTOR1 (PDF1) (Abe et al., 2003),

90 GDSL lipase LIP1 (Rombola-Caldentey et al., 2014) and ketoacyl-CoA synthase  
91 (KCS20), the latter of which catalyzes very long chain fatty acid (VLCFA) biosynthesis  
92 (Rombola-Caldentey et al., 2014). VLCFA produced in the epidermis are thought to  
93 function as signals affecting proliferation of internal tissues *via* inhibition of cytokinin  
94 synthesis, thus modulating plant growth (Nobusawa et al., 2013). PDF2 and ATML1 are  
95 reported to interact with DELLA proteins in regulation of cell expansion (Rombola-  
96 Caldentey et al., 2014). Upon gibberellin accumulation, DELLAs are subjected to  
97 proteolysis, releasing PDF2 and ATML1 to activate expression of L1 genes (Rombola-  
98 Caldentey et al., 2014).

99         Considering the key role of PDF2 and ATML1 in epidermal development, we  
100 investigated additional layers of regulation, whereby TF activity is controlled by a small  
101 molecule ligand. Based on the presence of an evolutionary conserved ligand-binding  
102 domain and their role as developmental regulators, HD-Zip START TFs were suggested  
103 to constitute a link between lipid metabolism and plant development (Ponting and  
104 Aravind, 1999; Schrick et al., 2004). One prediction is that START, by binding lipids,  
105 controls gene expression analogously to steroid hormone receptors from animals. An  
106 advantage of such a mechanism is that the metabolic state of the cell would be linked to  
107 cell growth and differentiation. However, the identities of small molecule ligands of the  
108 START domain have remained elusive. To address this gap in knowledge we applied a  
109 tandem affinity purification protocol adapted for concurrent analysis of small molecule  
110 and protein partners of PDF2, a representative HD-Zip START TF from *Arabidopsis*. We  
111 then performed an *in vitro* assay that indicates direct binding of START to  
112 lysophosphatidylcholines. Our additional findings from analysis of transcriptional targets  
113 and lipidomic analysis link PDF2 TF function with phospholipid metabolism. We propose  
114 a role for PDF2 in sensing membrane phospholipid status via its START domain.

115

## 116 **RESULTS**

### 117 **START domain of PDF2 recruits lysophospholipids *in vivo***

118 To investigate binding partners of the START domain from PDF2 we used tandem  
119 affinity purification (TAP) adapted for parallel analysis of protein and metabolite

120 interactors of the bait protein of choice (Luzarowski et al., 2017; Luzarowski et al., 2018)  
121 (**Figure 1A and 1B**). We generated *Arabidopsis* cell lines expressing either full-length  
122 PDF2 or mutants lacking the START domain ( $\text{pdf2}^{\Delta\text{START}}$ ) under control of the  
123 constitutive CaMV 35S promoter, with a TAP tag fused to either the amino- or carboxyl  
124 end. Whole cell native protein lysates (referred to as input) from cultures expressing  
125 PDF2,  $\text{pdf2}^{\Delta\text{START}}$  or empty vector were ultracentrifuged to deplete cellular membranes.  
126 TAP-tagged proteins were immunoprecipitated from soluble fractions, and following  
127 stringent washes, bait proteins together with interactors were released. The eluate was  
128 extracted yielding protein pellets, polar and nonpolar (lipid) metabolite fractions.

129 Presence of the bait protein was confirmed using mass-spectrometry based  
130 proteomics (**Figure 1C**). To delineate a list of PDF2 lipid interactors we calculated the  
131 enrichment of the different lipids in the eluate in relation to the input. Comparison of  
132 PDF2 versus  $\text{pdf2}^{\Delta\text{START}}$  cell lines (using input normalized data) identified 12 lipid  
133 species that were at least 4-fold more abundant ( $t$ -test,  $p < 0.05$ ;  $n = 6$ ) in PDF2 versus  
134  $\text{pdf2}^{\Delta\text{START}}$  lines (**Figure 1D; Supplemental Data Set 1**). Of the 12 differential lipid  
135 species, six were also at least 4-fold more abundant ( $t$ -test,  $p < 0.05$ ;  $n = 6$ ) in PDF2  
136 versus empty vector control lines, constituting a list of high confidence lipid binders  
137 (**Figure 1D**), with the highest enrichment for lysophosphatidylcholines (LysoPC 18:1  
138 and LysoPC 18:2) (**Figure 1E**). No differential lipid accumulation was found between  
139 the empty vector control and  $\text{pdf2}^{\Delta\text{START}}$  lines, implying specificity of binding  
140 (**Supplemental Data Set 1**). The TAP experiments demonstrate that the START  
141 domain of PDF2 is associated with lipids, preferentially lysophosphatidylcholines, in cell  
142 cultures.

143

#### 144 **Recombinant PDF2 protein binds lysophosphatidylcholines**

145 To test whether PDF2 directly binds lysophospholipids *in vitro*, a recombinant PDF2  
146 protein containing the ~26 kDa START domain was produced in *E. coli* (**Supplemental**  
147 **Figure 1A**). Similar to mammalian STARD1/StAR (Sluchanko et al., 2016), the PDF2  
148 START domain is highly insoluble when expressed in *E. coli*. To enhance solubility, the

149 maltose binding protein (MBP) was fused to its amino terminus. The MBP tag was  
150 removed by TEV protease cleavage prior to binding analysis. The pdf2(START)<sup>L467P</sup>  
151 protein with a missense mutation in the C-terminal  $\alpha$ -helix of START was used as a  
152 negative control, as L467 is a predicted ligand contact site (Roderick et al., 2002)  
153 (**Figure 2A**). The C-terminal  $\alpha$ -helix is conserved in START proteins from humans as  
154 well as among HD-Zip IV TFs (**Figure 2A**). Analogous mutations in human StAR result  
155 in congenital lipoid adrenal hyperplasia (Bose et al., 1996; Fluck et al., 2005). Homology  
156 modeling (Roy et al., 2010; Yang and Zhang, 2015) reveals structural similarity for  
157 START from PDF2 and GL2 (**Figure 2B**). In GL2, the analogous L480P mutation leads  
158 to loss-of-function (**Figure 2C-E**).

159 To examine binding of PDF(START) and pdf2(START)<sup>L467P</sup> to lysophospholipids,  
160 we used microscale thermophoresis (MST) in conjunction with small unilamellar  
161 liposomes prepared from DOPC (36:2 PC; 1,2-dioleoyl-sn-glycero-3-phosphocholine),  
162 PG 34:2 (1-palmitoyl-2-linoleoyl-sn-glycero-3-phosphoglycerol), and a 1:1 mixture of  
163 DOPC and LysoPC 18:1 (1-oleoyl-2-hydroxy-sn-glycero-3-phosphocholine) (**Figure 2F**,  
164 **Supplemental Figure 1B-D**). The data indicate that wild-type PDF(START) and mutant  
165 pdf2(START)<sup>L467P</sup> bind DOPC and PG 34:2 liposomes with comparable affinities. In  
166 contrast, the presence of LysoPC 18:1 favors interaction with wild-type PDF2(START)  
167 over the mutant. Specifically, the binding affinity to DOPC/LysoPC 18:1 liposomes was  
168 ~12-fold greater for PDF2 (START) ( $K_d=17 \mu\text{M}$ ) in comparison to pdf2(START)<sup>L467P</sup> ( $K_d$   
169 =200  $\mu\text{M}$ ) (**Figure 2F**). These *in vitro* binding data indicate that PDF2 associates with  
170 and directly binds lysophosphatidylcholines through its START domain, consistent with  
171 our TAP experiments (**Figure 1**).

172

### 173 **PDF2 transcriptional targets include phospholipid catabolism genes**

174 To investigate the connection between PDF2 and phospholipids, publicly available DNA  
175 affinity purification sequencing (DAP-seq) data (O'Malley et al., 2016) was mined for  
176 phospholipid-related gene targets using the PANTHER (Mi et al., 2019)  
177 overrepresentation test. Eight genes with gene ontology (GO) term “phospholipid

178 catabolic process” displayed a significant enrichment of ~9.8-fold compared to the  
179 representation expected if the target list were assembled at random (**Supplemental**  
180 **Data Set 2**). Putative transcriptional targets of PDF2 include non-specific phospholipase  
181 C enzymes (NPC2, AT2G26870; NPC4, AT3G03530; NPC6, AT3G48610),  
182 glycerophosphodiester phosphodiesterases (GDPD1, AT3G02040; GDPD2,  
183 AT5G41080; GDPD3, AT5G43300), and phospholipase D isoforms (PLD $\epsilon$ , AT1G55180;  
184 PLD $\zeta$ 2, AT3G05630). Two putative targets, namely *PLD $\epsilon$*  and *PLD $\zeta$ 2*, were also listed  
185 as one of 29 genes with GO term “cellular response to phosphate starvation”, displaying  
186 an enrichment of ~6.3-fold (**Supplemental Data Set 2**).

187

### 188 **PDF2 binds to P1BS element implicated in Pi starvation response**

189 Genome-wide DAP-seq peak data (O'Malley et al., 2016) for PDF2 revealed the  
190 palindrome GAATATTC as the main DNA-binding motif (**Figure 3A**). This octamer  
191 displays consensus to the previously identified P1BS element (GNATATNC) (Rubio et  
192 al., 2001). Under Pi limitation, P1BS is the binding site of PHOSPHATE STARVATION  
193 RESPONSE 1 (PHR1), which positively regulates phospholipid remodeling and other  
194 aspects of the Pi starvation response (Pant et al., 2015).

195 We used electrophoretic mobility shift assays (EMSA) to validate DNA binding of  
196 *in vitro* translated PDF2 to the P1BS palindrome. Wild-type PDF2 caused a shift in  
197 mobility of Cy3-labeled oligonucleotide containing GAATATTC (**Figure 3B and 3C**), in  
198 contrast to missense mutant pdf2<sup>K107E</sup> in which a conserved arginine in the HD is  
199 replaced with glutamic acid (**Figure 3B and 3C**). Similarly to PDF2, its paralog ATML1  
200 also bound the GAATATTC palindrome (**Figure 3C**). Genomic regions of eight putative  
201 target genes implicated in phospholipid catabolism were searched for the palindrome.  
202 Strikingly, P1BS elements with 100% consensus to GAATATTC overlapped with DAP-  
203 seq peaks in the promoters or 5'-UTR regions of *GDPD1*, *GDPD2*, *GDPD3*, *NPC4*,  
204 *PLD $\epsilon$*  and *PLD $\zeta$ 2* (**Figure 3D**). In contrast, *NPC2* and *NPC6* exhibited peaks in internal  
205 exons of their coding regions (**Figure 3D**).

206



## 207 **PDF2 is a transcriptional repressor of several phospholipid catabolism genes**

208 We applied quantitative real-time PCR (qRT-PCR) in conjunction with mutant analysis  
209 to test whether PDF2 is a positive or negative regulator of targets that mediate  
210 phospholipid catabolism (**Figure 3E**). Since PDF2 is expressed in the epidermis and the  
211 DAP-seq experiment utilized genomic DNA from young leaves (O'Malley et al., 2016),  
212 we extracted RNA from seedling shoots. This material contains epidermis as well as  
213 other tissues that do not express *PDF2*. Therefore, we considered small differences  
214 from wild type, if statistically significant, to be indicative of altered gene expression in  
215 mutants. The qRT-PCR data show that in comparison to wild-type, *GDPD1* transcripts  
216 were upregulated in *pdf2-1* and *pdf2-2*, as well as *atml1-1;pdf2-1* mutants (**Figure 3E**).  
217 Four of the genes (*GDPD2*, *GDPD3*, *NPC4*, *PLD $\zeta$ 2*) also exhibited elevated transcripts  
218 in *pdf2-1*, *pdf2-2*, or *atml1-1;pdf2-1*, consistent with PDF2 acting a repressor (**Figure**  
219 **3E**). In contrast, *atml1-4* and *gl2-5* mutants did not exhibit upregulation. The *pdf2-1*,  
220 *pdf2-2*, and *atml1-1;pdf2-1* mutants exhibited downregulation of *NPC2* (**Figure 3E**),  
221 while *pdf2-2* mutants showed downregulation of *PLD $\epsilon$* .

222 To examine the expression of selected target genes under Pi sufficiency and  
223 limitation (**Figure 3F**), we tested *pdf2-4* mutants carrying the null allele (Kamata et al.,  
224 2013b), alongside wild type and *pdf2-1* mutants (**Supplemental Figure 2**). Consistent  
225 with previous studies (Nakamura et al., 2005; Li et al., 2006; Cheng et al., 2011; Su et  
226 al., 2018), all genotypes showed upregulation of *GDPD1*, *NPC4*, and *PLD $\zeta$ 2* under Pi  
227 limitation, while *PLD $\epsilon$*  was downregulated (**Figure 3F**). For the upregulated genes, one  
228 or both *pdf2* alleles exhibited enhanced upregulation in the case of upregulated target  
229 genes and enhanced downregulation in the case of *PLD $\epsilon$* , a downregulated gene  
230 (**Figure 3F**). These results reveal that PDF2 TF activity is required for maintaining  
231 normal transcript levels of phospholipid catabolic genes under both Pi sufficiency and  
232 limitation.

233 We asked whether ectopic expression of *PDF2* can drive repression or activation  
234 of phospholipid catabolism target genes. We compared transgenic lines expressing  
235 *EYFP:PDF2* with mutant *EYFP:pdf2 $^{\Delta$ ST* in which the START domain is deleted (**Figure**  
236 **3G**). Wild-type *EYFP:PDF2* exhibited downregulation of *GDPD1* and *NPC4* in



237 comparison to *EYFP:pdf2*<sup>ΔST</sup> (**Figure 3G**). Consistent with our mutant analysis (**Figure**  
238 **3E and 3F**), this result indicates that PDF2 is a transcriptional repressor of *GDPD1* and  
239 *NPC4*. In contrast, *PLDε* was upregulated in *EYFP:PDF2* in comparison to  
240 *EYFP:pdf2*<sup>ΔST</sup>, indicating positive regulation. The difference in activity between the wild-  
241 type and mutant transgenic lines cannot be attributed to mRNA expression since both  
242 expressed similar levels of *EYFP:PDF2/pdf2*<sup>ΔST</sup> transcript (**Figure 3H**). Strikingly, the  
243 *EYFP:pdf2*<sup>ΔST</sup> line exhibited ~2-fold lower levels of endogenous *PDF2* mRNA (**Figure**  
244 **3H**), consistent with the idea that this mutant, which retains the HD, interferes with  
245 autoregulation of *PDF2* through the L1 box. While *pdf2-1* showed wild-type levels of  
246 *PDF2* transcript, the *pdf2-4* null allele exhibited a ~3-fold increase in mRNA (**Figure 3I**).  
247 In contrast, the *pdf2-2* allele which retains the HD (Peterson et al., 2013)  
248 (**Supplemental Figure 2**) resulted in ~2-fold lower levels of expression similar to the  
249 *EYFP:pdf2*<sup>ΔST</sup> transgenic line.

250

## 251 **Lipidomic profiling of mutants reveals defects in phospholipid homeostasis**

252 Gene expression changes in phospholipid catabolic genes are expected to result in  
253 altered phospholipid profiles and defects in membrane lipid remodeling. We performed  
254 a lipidomic analysis from the same shoot tissues as those used for qRT-PCR. Our LC-  
255 MS platform targeted >240 lipid species including phospholipids (LysoPC, PC, PE, PG,  
256 PI, PS), sphingolipids (ceramides (Cer) and glucosylceramides (GlcCer)), glycolipids  
257 (DGDG, MGDG, SQDG), diacyl- and triacylglycerols (DAG, TAG), and fatty acids (FA).  
258 Representative lipids from each major class were quantified in wild type and mutants for  
259 *PDF2*, *ATML1* and *GL2*. (**Supplemental Data Set 3; Supplemental Figures 2 and 3**).  
260 The *atml1-1;pdf2-1* double mutants display morphological defects at the seedling stage  
261 (**Supplemental Figure 2B**) (Abe et al., 2003), and we detected striking lipid changes in  
262 comparison to wild type (**Supplemental Figure 2C**), including significant differences in  
263 >100 lipid species (**Supplemental Data Set 3; Supplemental Table 1**). Phospholipids  
264 LysoPC, PE, PI, and PS were generally increased in *atml1;pdf2*. Other lipids that  
265 showed increases included DAGs, TAGs, FA, and Cer, while GlcCer, DGDG, MGDG,  
266 and SQDG were decreased (**Supplemental Data Set 3; Supplemental Figure 2C**).

267 The other HD-Zip mutants displayed phospholipid defects to a lesser degree. The *pdf2-*  
268 *1* single mutants exhibited increases in several PC and PS lipids (**Supplemental Data**  
269 **Set 3; Supplemental Figure 3**). Both *atml1* alleles exhibited abnormal decreases in PG  
270 and PI lipids (**Supplemental Data Set 3; Supplemental Figures 2C and 3**). We also  
271 detected phospholipid alterations in *gl2-5* mutants, such decreases in PS lipid species  
272 (**Supplemental Data Set 3; Supplemental Figure 3**). Alterations in DAG, TAG,  
273 glycolipids and FA were additionally observed, as expected from membrane lipid  
274 remodeling.

275

### 276 **START domain is critical for lipid homeostasis**

277 In a second lipidomics experiment we monitored lipid composition under Pi sufficiency  
278 and limitation for *pdf2*, *atml1* and *gl2* mutants in comparison to wild type (**Supplemental**  
279 **Data Set 4; Figure 4A**). To address the role of the START domain in lipid homeostasis,  
280 we included transgenic lines that were either wild-type (*PDF2* and *GL2*) or mutant for  
281 the START domain (*pdf2*<sup>ΔST</sup> and *gl2*<sup>L480P</sup>). These transgenes are expressed as EYFP-  
282 tagged proteins in the *gl2-5* background under the epidermal-specific *GL2* promoter,  
283 which drives expression in specialized epidermal cell types including trichomes (Khosla  
284 et al., 2014). We included three *pdf2* alleles (*pdf2-1*, *pdf2-2* and *pdf2-4*). Based on the  
285 position of their T-DNA insertion (**Supplemental Figure 2A**), the *pdf2-1* and *pdf2-2*  
286 alleles affect START domain activity while retaining the HD, in contrast to the *pdf2-4* null  
287 allele (Kamata et al., 2013b). Likewise, *atml1-4* affects START but not HD, while *atml1-*  
288 *3* represents a null allele (**Supplemental Figure 2A**).

289 Pi limitation resulted in lower levels of phospholipids in wild type, as previously  
290 reported (Li et al., 2006), and we observed this trend in all lines (**Supplemental Data**  
291 **Set 4; Figure 4A; Supplemental Figure 4**). The *pdf2-2* seedlings exhibited a notably  
292 altered phospholipid profile: LysoPCs were significantly increased and others (PC, PG,  
293 PS) were increased or decreased under Pi sufficiency, whereas >30 phospholipids  
294 (LysoPC, PC, PE, PG, PS) exhibited enhanced accumulations FC ≥ 2 under Pi  
295 limitation (**Figure 4A; Supplemental Figure 5**). The *pdf2-1* mutants also exhibited

296 altered levels of several PCs, as well as other abnormal lipid accumulations, especially  
297 TAGs and FAs, similar to *pdf2-2*, and strikingly, these defects were more pronounced  
298 under Pi limitation (**Figure 4A-C; Supplemental Table 2; Supplemental Table 3**).

299 We compared lipid profiles of seedlings expressing wild-type *EYFP:PDF2* to the  
300 *EYFP:pdf2<sup>ΔST</sup>* mutant. Strikingly, *pdf2<sup>ΔST</sup>* exhibited FC  $\geq 2$  increases in LysoPCs (16:0,  
301 18:2, 18:3) and several other phospholipids under Pi limitation (**Figure 4B;**  
302 **Supplemental Figure 5; Supplemental Table 4**). In contrast, several ceramides were  
303 increased only under Pi sufficiency (**Supplemental Figure 5**). Similarly, when we  
304 compared wild-type *EYFP:GL2* to START domain mutant *EYFP:gl2<sup>L480P</sup>* we also noted  
305 lipid changes that varied with Pi status (**Supplemental Figure 5H**). LysoPC 18:2 and  
306 several FAs were elevated FC  $\geq 2$  in *gl2<sup>L480P</sup>* under Pi limitation. We compared lipid  
307 changes in *pdf2-2* and *pdf2<sup>ΔST</sup>* which both affect START domain (but not HD) function  
308 and both exhibit reduced levels of endogenous *PDF* transcript (**Figure 3H and 3I**).  
309 Under Pi limitation, *pdf2-2* and *pdf2<sup>ΔST</sup>* shared numerous phospholipid increases in  
310 comparison to controls (**Figure 4B; Supplemental Figure 5; Supplemental Table 3;**  
311 **Supplemental Table 4**). We also noted a trend indicating multiple FA species elevated  
312 in both START domain mutants (**Figure 4C**). Overall, the results suggest imbalances in  
313 phospholipid and FA levels in START domain mutants, notably under Pi starvation.

314

### 315 ***PDF2* drives elongation growth in the root**

316 To identify a growth phenotype associated with HD-Zip function, we assayed null  
317 mutant seedlings for *PDF2*, *ATML1* and *GL2* for vertical root growth in Pi sufficient and  
318 limiting media (**Figure 5A**). The *pdf2-4* null mutant exhibited altered elongation growth  
319 under Pi sufficient conditions, while *atml1-3* and *gl2-5* null mutants appeared  
320 indistinguishable from wild type (**Figure 5B**). Root elongation was mildly altered for all  
321 three null mutants (*pdf2-4*, *atml1-3* and *gl2-5*) under Pi limitation (**Figure 5B**).

322 We next examined seedlings expressing *EYFP:PDF2* under the epidermal  
323 specific *GL2* promoter in the *gl2-5* background. The *GL2* promoter drives expression in  
324 trichomes and in non-root hair cells (Khosla et al., 2014), which undergo extensive

325 elongation in the seedling. Expression of wild-type *EYFP:PDF2*, but not HD mutant  
326 *EYFP:pdf2<sup>K107E</sup>* or START mutant *EYFP:pdf2<sup>ΔST</sup>*, partially rescued the trichome defect  
327 of *gl2-5* (**Figure 5C and 5D**). To further test whether *PDF2* is critical for elongation  
328 growth we measured root lengths in *EYFP:PDF2* versus *EYFP:pdf2<sup>ΔST</sup>* seedlings  
329 (**Figure 5E and 5F**). The data indicate that ectopic expression of wild-type *PDF2* under  
330 both Pi sufficiency and limitation results in increased elongation, whereas elongation in  
331 *pdf2<sup>K107E</sup>* or *pdf2<sup>ΔST</sup>* was indistinguishable from the control. At later stages, we observed  
332 growth defects and aberrant leaf morphologies in the *PDF2* expressing lines, but not in  
333 *pdf2<sup>K107E</sup>* or *pdf2<sup>ΔST</sup>* lines (**Supplemental Figure 6**). EYFP-tagged *PDF2* protein  
334 exhibited nuclear localization under both Pi sufficiency and limitation (**Figure 5G**), and  
335 mutant *pdf2* proteins were also expressed in nuclei (**Figure 5H**). The data indicate that  
336 ectopic epidermal *PDF2* expression drives elongation growth in the root, and the  
337 observed growth phenotype is dependent on both the HD and START domains.

338

### 339 **START domain mutation L480P affects elongation growth and repression of** 340 ***PLD $\zeta$ 1***

341 We further tested whether the START domain is required to control elongation growth  
342 by comparing *gl2-5* seedlings stably expressing *proGL2:EYFP:GL2* or  
343 *proGL2:EYFP:gl2<sup>L480P</sup>*. The START domain mutation L480P leads to trichome defects  
344 (**Figure 2C-2E; Figure 6A**). Additionally, the *gl2<sup>L480P</sup>* seedlings displayed slightly  
345 decreased elongation under Pi sufficiency, and increased elongation in comparison to  
346 wild type under Pi limitation (**Figure 6B**). Although both transgenes were expressed and  
347 the respective proteins were nuclear localized, only wild-type *GL2* but not mutant  
348 *gl2<sup>L480P</sup>* showed repression of phospholipase target gene (Ohashi et al., 2003) *PLD $\zeta$ 1*  
349 (**Figure 6C and 6D**). The differential growth phenotype of *gl2<sup>L480P</sup>* versus wild-type *GL2*  
350 as well as qRT-PCR analysis suggests that a functional ligand-binding START domain  
351 is critical for normal elongation growth and target gene repression in response to Pi  
352 availability.

353

354 **PDF2 and GL2 exhibit reduced protein stability under Pi limitation, and protein**  
355 **destabilization is enhanced in START mutant L480P**

356 Time-course microarray profiles of *Arabidopsis* seedlings previously indicated that  
357 *PDF2*, *ATML1* and *GL2* transcripts are not significantly up- or downregulated in the  
358 initial response to Pi starvation (Lin et al., 2011). However, our qRT-PCR data indicate  
359 that prolonged Pi limitation results in downregulation of both *PDF2* and *GL2* transcripts  
360 in seedlings (**Figure 3**), possibly due to feedback mechanisms affecting TF function.  
361 Therefore, we asked whether HD-Zip TF levels are post-translationally regulated. We  
362 performed cycloheximide assays with seedlings expressing tagged TFs to determine  
363 whether the START domain affects protein stability depending on Pi status. We first  
364 examined the stability of hemagglutinin-tagged proteins, HA:PDF2 and HA:GL2, and  
365 found both to exhibit reduced half-lives under Pi limitation (**Figure 6E; Supplemental**  
366 **Figure 7**). We next examined the EYFP:GL2 protein and found it to be stable over a 24-  
367 h time course under Pi sufficiency (**Figure 6E**). The increased stability of EYFP:GL2 in  
368 comparison to HA:GL2 is likely due to the larger tag (~28 kDa versus ~1 kDa). Similar to  
369 the HA-tagged proteins, EYFP:GL2 exhibited reduced stability under Pi limitation. In  
370 comparison, the EYFP:gl2<sup>L480P</sup> mutant protein exhibited a decrease in stability and half-  
371 life of ~10 h under Pi sufficiency (**Figure 6F; Supplemental Figure 7**). The half-life of  
372 EYFP:gl2<sup>L480P</sup> was further reduced to ~2 h under Pi limitation (**Figure 6F**), indicating  
373 that START is critical for protein stability under both conditions. Coincubation of  
374 seedlings with cycloheximide and proteasome inhibitor MG132 restored stability of  
375 EYFP:gl2<sup>L480P</sup> under Pi limitation (**Figure 6F**), suggesting that EYFP:gl2<sup>L480P</sup> protein is  
376 degraded via the 26S proteasome. These experiments reveal that HD-Zip TFs are  
377 destabilized under Pi limitation, and that the START domain contributes to protein  
378 stability.

379

380 **DISCUSSION**

381 **HD-Zip protein PDF2 binds lysophospholipids via its START domain**

382 The main finding herein is that PDF2, via its START domain, directly interacts with  
383 lysophosphatidylcholines. Our initial strategy was to identify *in vivo* binding partners of

384 this representative HD-Zip TF by performing TAP experiments with *Arabidopsis* cell  
385 lines. We followed up on candidate ligands using *in vitro* binding validation. Our data are  
386 consistent with a previous study in which START domains of PDF2, ATML1, and GL2  
387 were heterologously expressed in yeast and subjected to immunoisolation (Schrick et  
388 al., 2014). Subsequent lipidomic analysis revealed enrichment of  
389 lysophosphatidylcholines and other phospholipids (PC and PS) in START domain pull-  
390 down samples (Schrick et al., 2014). Although it is possible that the epidermal cells in  
391 which these HD-Zip TFs are predominantly expressed contain additional ligands,  
392 lysophospholipids now emerge as important PDF2 interactors.

393 Lysophosphatidylcholine arises from partial hydrolysis of PC to remove one of  
394 the fatty acid groups. Since Pi starvation induces breakdown of PC in plants,  
395 lysophosphatidylcholines serve as intermediates of the plastidic lipid biogenesis  
396 pathway. It was proposed ~20 years ago that lysophosphatidylcholine is exported from  
397 ER to chloroplast as a precursor for galactolipid synthesis (Mongrand et al., 2000).  
398 Lysophospholipids are additionally thought to serve as messengers in plants. In  
399 arbuscular mycorrhizal symbiosis, roots use lysophosphatidylcholine as a signaling  
400 molecule to induce expression of endogenous Pi transporter genes (Drissner et al.,  
401 2007).

402 PDF2 START domain binding to lysophosphatidylcholines in *Arabidopsis* cells  
403 (**Figure 1**) and in yeast (Schrick et al., 2014) as well as *in vitro* (**Figure 2F**) builds on  
404 mounting evidence that links HD-Zip IV TFs with phospholipid sensing. In 2003, GL2  
405 was identified as a negative regulator of phospholipase D (*PLD $\zeta$ 1*) in root hair  
406 patterning (Ohashi et al., 2003). Further insights came from studies with mammalian  
407 STARD2/phosphatidylcholine transfer protein (PCTP), which binds phosphatidylcholine  
408 and is expressed during embryonic development in the mouse. STARD2/PCTP  
409 interacts with and enhances TF activity of Pax3, a mammalian HD protein (Kanno et al.,  
410 2007). The START domain from human PCTP, similarly to the PDF2 START domain,  
411 also recruits lysophosphatidylcholines in pull-down experiments in yeast (Schrick et al.,  
412 2014). Our findings introduce the intriguing possibility that START-dependent



413 mechanisms linking Pi sensing and transcriptional control of phospholipid metabolism  
414 are conserved across organisms.

415

## 416 **Dual role of PDF2 as a metabolic sensor and transcriptional regulator of** 417 **phospholipid metabolism**

418 Here we identify PDF2 as a negative regulator of several phospholipid catabolism  
419 genes. Until now, PDF2 was viewed as an activator that functions redundantly with  
420 ATML1 to positively regulate L1 genes. Surprisingly, the DAP-seq data identified the  
421 P1BS element (GAATATTC) as the main DNA-binding motif for PDF2 (**Figure 3A**), as  
422 opposed to the L1 box (TAAATCTA), which was reported as the DNA-binding motif for  
423 both ATML1 and PDF2 (Rombola-Caldentey et al., 2014). Our gene expression studies  
424 show that *pdf2*, and not *atml1* mutants exhibit transcriptional upregulation of several  
425 phospholipid catabolism genes, suggesting that PDF2 is the main repressor of these  
426 genes in the shoot. Moreover, ectopic *PDF2* expression was sufficient to drive  
427 repression (**Figure 3G**). Since ATML1 also binds the P1BS element (**Figure 3C**), its  
428 activity may be critical for a different subset of target genes. The lipidomics data  
429 (**Supplemental Data Sets 3-5; Figure 4; Supplemental Figures 2-5**) implicate both  
430 ATML1 and PDF2 as regulators of phospholipid homeostasis.

431 We propose that PDF2 functions as a lipid sensor for phospholipids via its  
432 START domain (**Figure 7A**). In our model, lysophosphatidylcholines bind to START to  
433 stabilize the protein, resulting in transcriptional activity. PDF2 directly binds to the  
434 promoters of several phospholipid catabolism genes to promote incorporation of  
435 phospholipids into membranes, driving elongation growth. Mutant analysis indicates that  
436 PDF2 is important for transcript levels of phospholipid catabolic genes (**Figure 3**). *PLD $\epsilon$*   
437 overexpression enhances root growth under Pi deprivation (Hong et al., 2009),  
438 consistent with our finding that PDF2 positively regulates this target gene. Under Pi  
439 starvation, overall phospholipid levels including lysophospholipids decrease, resulting in  
440 reduced PDF2 protein levels and reduced cell elongation. However, PDF2 levels are not  
441 completely abolished. According to this model, the transcriptional activity of PDF2 is



442 critical to regulate phospholipid catabolic genes to allow measured growth according to  
443 lysophospholipid levels. Under Pi limitation, we suggest that a pool of PDF2 protein is  
444 either unliganded or bound to a destabilizing ligand, resulting in proteasome-mediated  
445 degradation.

446 PDF2 activity is positioned to protect membrane lipid biogenesis in the epidermis  
447 when Pi is limiting. Derepression of phospholipid catabolic genes leads to the  
448 production of fatty acids, glycolipids, as well as DAG and TAG, and recycling back to  
449 phospholipids (**Figure 7B**). Our lipidomic profiling of *pdf2*, *atml1*, and *gl2* mutants  
450 uncovered altered levels of several types of phospholipids, as well as products of  
451 phospholipid catabolism. While *pdf2* null mutants exhibited elongation defects in the  
452 seedling, we found that ectopic expression of *PDF2* drives root elongation. The growth  
453 promoting activity in the seedling requires the function of both the START domain and  
454 HD (**Figure 5F**). In contrast, ectopic expression of *EYFP:PDF2* or *EYFP:ATML1* under  
455 the *GL2* epidermis-specific promoter leads to dwarfism in adult plants (**Supplemental**  
456 **Figure 6**), a phenotype that is abolished by HD or START domain mutation. These  
457 observations highlight the importance of PDF2 and ATML1 function in maintaining the  
458 normal growth pattern.

459 Why should a phospholipid sensing mechanism that transcriptionally controls  
460 phospholipid catabolism function in the epidermis? In addition to its myriad protective  
461 functions, the epidermis plays a critical role in controlling growth. The brassinosteroid  
462 pathway for cell expansion and cell division is required in the L1 layer (Savaldi-  
463 Goldstein et al., 2007), and epidermis-localized VLCFA biosynthesis is implicated in  
464 growth control (Nobusawa et al., 2013). *NPC4*, which is negatively regulated by PDF2  
465 (**Figure 3**), was reported to be critical for hydrolysis and breakdown of glycosyl inositol  
466 phosphoceramides (GIPC) (Yang, 2021). These phosphosphingolipids, along with  
467 phosphoglycerolipids, are major constituents of the plasma membrane. We uncovered  
468 evidence that *PDF2* negatively regulates *PLD $\zeta$ 2*, a gene responsible for Pi-deficit  
469 induced PC hydrolysis (Su et al., 2018). It is estimated that in plants, about one-third of  
470 cellular Pi is stored in membrane phospholipids. Our study highlights the importance of

471 membrane phospholipids and lipid homeostasis as a regulator of growth in the  
472 epidermis.

473

#### 474 **Perspectives on START domains as phospholipid sensors**

475 Whether other START domain-containing HD-Zip TFs besides PDF2 bind  
476 lysophospholipids needs to be tested experimentally. Considering that mammalian  
477 START proteins differ in their specificity towards various lipids ranging from fatty acids  
478 to sterols, a similar diversification is expected in plants. VLCFA-ceramides were recently  
479 proposed to bind the START domain of ATML1 (Nagata et al., 2021). Fitting with this  
480 possibility, our TAP results for PDF2 identified one ceramide species (Cer t18:1/c24:0)  
481 that is enriched in wild-type versus the *pdf2*<sup>ΔSTART</sup> mutant (**Figure 1E**). Aside from HD-  
482 Zip III and IV TFs, *Arabidopsis* contains 14 START proteins whose ligands are unknown  
483 (Schrick et al., 2004). Recently, a START protein from *Marchantia* was implicated in  
484 lipid transfer activity during Pi deprivation (Hirashima et al., 2021). The only other plant  
485 START protein reported to bind lipids, the wheat stripe rust resistance protein WKS1,  
486 appears to show specificity towards phosphatidic acid and phosphatidylinositol  
487 phosphates in lipid blots (Gou et al., 2015).

488 It is noteworthy that this newly discovered lipid metabolism connection relates to  
489 sensing of Pi, a nutrient that is crucial for plant growth. Our findings open a new area of  
490 research that will further explore how Pi sensing and membrane lipid metabolism are  
491 integrated with the developmental program in plants and across multicellular organisms.  
492 Intriguingly, a human START protein of the thioesterase family (THEM1/STARD14) that  
493 is critical for brown fat metabolism is allosterically regulated via its binding to  
494 lysophosphatidylcholine in addition to fatty acids (Tillman et al., 2020). Since both  
495 lysophosphatidylcholines and fatty acids are breakdown products of membrane lipid  
496 catabolism in plants, future avenues of research will explore how START domains  
497 evolved to effectively orchestrate gene expression networks according to  
498 environmentally guided metabolic inputs.

499

## 500 METHODS

### 501 Plant cell cultures, Plants and growth conditions

502 PSB *Arabidopsis thaliana* cell cultures (Van Leene et al., 2011) were grown in MSMO  
503 medium with 3% sucrose, 0.05 mg/L kinetin and 0.5 mg/L 1-naphthaleneacetic acid at  
504 130 rpm. Cells were passaged weekly to fresh medium and harvested during  
505 logarithmic growth using rapid filtration and liquid nitrogen snap freezing.  
506 Transformation with TAP constructs was as described previously (Van Leene et al.,  
507 2011). *Arabidopsis thaliana* plants were of the Columbia (Col-0) ecotype. Seeds for  
508 *pdf2-1* and *atml1-1* (Abe et al., 2003) were provided by Taku Takahashi. Both *atml1-3*  
509 (SALK\_033408) and *atml1-4* (SALK\_128172) are T-DNA insertion alleles (Roeder et al.,  
510 2012) provided by Adrienne Roeder. *gl2-5* is a En-1 insertion allele of *GL2* (Ohashi et  
511 al., 2003; Khosla et al., 2014). *pdf2-2* (SALK\_109425) and *pdf2-4* (SAIL\_70G06) T-DNA  
512 insertion lines (Kamata et al., 2013b; Peterson et al., 2013) were from ABRC.  
513 Genotyping primers are listed in **Supplemental Table 5**. *HA:PDF2* and *HA:GL2* were  
514 transformed into Col-0 plants. The *proGL2:EYFP:GL2*, *proGL2:EYFP:PDF2* and  
515 *proGL2:EYFP:PDF2* constructs (and mutant variants) were transformed into *gl2-5*, while  
516 *proGL2:EYFP:PDF2* was additionally transformed into *ATML1/atml1-1;pdf2-1* and Col-  
517 0. *Agrobacterium* strain GV3101 (MP90) was used for transformation and construction  
518 of transgenics by floral dip (Clough and Bent, 1998), followed by selection on 20 µg/ml  
519 hygromycin B. Segregation patterns of 3:1 for EYFP expression were observed among  
520 T2 progeny from at least 20 independent transformants, and representative  
521 homozygous T3 lines were selected for analysis. *Arabidopsis* plants were grown at  
522 23°C under continuous light on soil comprised of Metro-Mix 380, vermiculite and perlite  
523 (4:3:2) (Hummert International). For RNA or lipid extraction, seeds were sterilized by  
524 chlorine gas treatment and sown onto 0.8% agar (Micropropagation Type II; Caisson  
525 Labs) containing Murashige and Skoog (MS) basal salts (Sigma-Aldrich) (Murashige  
526 and Skoog, 1962), 1% Suc, and 0.05% MES buffer at pH 5.8. Seeds were transferred to  
527 23°C and grown under continuous light for 12 or 14 d. A razor blade was used to  
528 remove roots, and shoots were processed for RNA or lipid extraction. For growth under  
529 Pi limitation, vapor-sterilized seeds were germinated on Pi sufficient (P+) media (20.6  
530 mM NH<sub>4</sub>NO<sub>3</sub>, 2.26 mM CaCl<sub>2</sub> dihydrate, 0.759 mM MgSO<sub>4</sub> heptahydrate, 18.8 mM

531 KNO<sub>3</sub> and 1.25 mM KH<sub>2</sub>PO<sub>4</sub> monobasic, MS micronutrient solution (M529, PhytoTech  
532 Labs), 1% Suc, 0.05% MES, pH 5.7, 0.8% agar) or Pi limiting (P-) media (lacking  
533 KH<sub>2</sub>PO<sub>4</sub> monobasic).

534

### 535 **Constructs for plant transformation**

536 TAP constructs were generated by Gateway technology using *pKCTAP* and  
537 *pKNGSTAP* as described previously (Van Leene et al., 2011). PDF2 was amplified from  
538 an *Arabidopsis* cDNA library using PCR primers listed in **Supplemental Table 5**. The  
539 pdf2<sup>ΔSTART</sup> constructs were generated by PCR amplification of PDF2 binary N' and C'  
540 TAP constructs using PCR primers flanking the START domain (**Supplemental Table**  
541 **5**) followed by ligation. The SR54 binary vector for expression of GL2 under its native  
542 promoter (*proGL2:EYFP:GL2*) in plants was previously described (Schrick et al., 2014).  
543 To construct binary vectors expressing *PDF2* and *ATML1*, cDNA sequences were PCR  
544 amplified using Q5 High Fidelity Polymerase (New England Biolabs) and cloned into  
545 SR54 *proGL2:EYFP* cleaved with *Sall* and *KpnI* using NEBuilder HiFi DNA Assembly  
546 Master Mix (New England Biolabs) with gene-specific primers (**Supplemental Table 5**).  
547 The K107E and ΔSTART mutations in *PDF2* were generated using Q5 Site-Directed  
548 Mutagenesis Kit (New England Biolabs). The L480P mutation in *GL2* was generated by  
549 one-step PCR-based site-directed mutagenesis (Scott et al., 2002) using PfuUltra II  
550 Fusion HS DNA polymerase (Agilent Technologies) with primers listed in **Supplemental**  
551 **Table 5**. *HA:PDF2* and *HA:GL2* were constructed by transferring the respective cDNAs  
552 from pENTR/D-TOPO plasmids into pEarleyGate 201 (Earley et al., 2006) using  
553 Gateway LR Clonase II (Invitrogen).

554

### 555 **Tandem affinity purification**

556 Affinity purification was performed as previously described (Luzarowski et al., 2017;  
557 Luzarowski et al., 2018). Whole cell native protein lysates (inputs) were harvested from  
558 *Arabidopsis* cell cultures expressing 35S:TAP:PDF2, 35S:PDF2:TAP,

559 35S:TAP:pdf2<sup>ΔSTART</sup>, 35S:pdf2<sup>ΔSTART</sup>:TAP, or empty vector. A soluble (membrane  
560 depleted) fraction was obtained by centrifugation of the lysate for 10 min at 14,000 rcf at  
561 4°C, followed by ultracentrifugation for 1 h at 35,000 rcf at 4°C, and subsequent  
562 incubation with IgG Sepharose. After stringent washes, bait proteins were released from  
563 the beads by TEV protease cleavage. Samples were extracted as previously described  
564 (Giavalisco et al., 2011), using a methyl-tert-butyl ether (MTBE)/methanol/water solvent  
565 system to separate proteins, lipids, and polar compounds into pellet, organic, and  
566 aqueous phases, respectively. Following extraction, organic and aqueous phases were  
567 dried and stored at -20°C until LC/MS analysis.

568

### 569 **LC/MS analysis**

570 Ultra-performance liquid chromatography (Waters Acquity UPLC System) coupled to an  
571 Exactive mass spectrometer (ThermoFisher Scientific) in positive and negative  
572 ionization mode was used to analyze the samples as described (Giavalisco et al.,  
573 2011). UPLC separation of the polar fraction was performed using an HSS T3 C18  
574 reversed-phase column (100 mm × 2.1 mm × 1.8 μm particles; Waters). The mobile  
575 phases were 0.1% formic acid in water (Buffer A, ULC/MS; Biosolve) and 0.1% formic  
576 acid in acetonitrile (Buffer B, ULC/MS; Biosolve). A 2 μL sample (the dried-down  
577 aqueous fraction was resuspended in 200 μL of UPLC grade water) was loaded per  
578 injection. UPLC separation of the lipid fraction was performed using a C8 reversed-  
579 phase column (100 μm × 2.1 μm × 1.7 μm particles; Waters). Mobile phases were H<sub>2</sub>O  
580 (ULC/MS; Biosolve) with 1% 1 mM NH<sub>4</sub>Ac, 0.1% acetic acid (Buffer A) and  
581 acetonitrile:isopropanol (7:3, ULC/MS; Biosolve) containing 1% 1 mM NH<sub>4</sub>Ac, 0.1%  
582 acetic acid (Buffer B). A 2 μL sample (of the dried-down organic fraction resuspended in  
583 200 μL of acetonitrile:isopropanol (7:3)) was loaded per injection. Processing of  
584 chromatograms, peak detection, and integration were performed using Refiner MS 12.0  
585 (GeneData). Processing of mass spectrometry data included removal of isotopic peaks  
586 and of chemical noise, retention time alignment and adduct detection. Metabolic  
587 features (m/z at a given retention time) were queried against an in-house reference

588 compound library (allowing 10 ppm error and up to 0.2 min deviation from the retention  
589 time).

590

## 591 **Recombinant protein production**

592 The START domain coding region of PDF2 (PDF2(START)) was PCR amplified using  
593 gene-specific primers having ligation independent cloning (LIC) compatible extensions  
594 (**Supplemental Table 5**). Gel-purified PCR product and *SspI*-digested pET-His6-MBP-  
595 TEV-LIC vector (Addgene) were treated with T4 DNA polymerase with 25 mM dCTP  
596 and dGTP for 30 min at 22°C followed by heat inactivation. A 6 µl mixture of PCR  
597 product and vector was incubated at 22°C for 30 min, followed by addition of 1 µl 25 mM  
598 EDTA and *E. coli* transformation. Primers used to generate *pdf2*<sup>L467P</sup> via site-directed  
599 mutagenesis are listed in **Supplemental Table 5**. *E. coli* BL21 Rosetta 2 (DE3)  
600 (Novagen) cells carrying pET-His6-MBP-TEV-PDF2(START) and *pdf2*(START)<sup>L467P</sup>  
601 were grown overnight in 5 mL LB with 40 µg/mL kanamycin at 37°C. The next day, 0.5 L  
602 freshly prepared media was inoculated with 1 mL of culture and growth was continued  
603 at 28°C. At OD<sub>600</sub> 0.6, expression was induced with 0.5 mM IPTG (Sigma-Aldrich),  
604 followed by incubation at 16°C for 16 h. Cells were harvested by centrifugation at 4,000  
605 rcf, 10 min at 4°C, the pellet was frozen in liquid nitrogen and stored at -20°C for 1 h.  
606 The cells were resuspended in 20 mL of ice-cold lysis buffer containing 50 mM sodium  
607 phosphate pH 7.4, 500 mM NaCl, 1 mM imidazole, 0.5 mM TCEP, 1 mM PMSF (Sigma-  
608 Aldrich), 10% glycerol, 0.1% [w/v] lysozyme (AppliChem) and cOmplete Protease  
609 Inhibitor Cocktail, EDTA free (Sigma-Aldrich). Bacterial slurry was sonicated in an ice-  
610 cold ultrasonic bath (RK 31, Bandelin) for 10 min, followed by centrifugation at 13,000  
611 rcf for 10 min at 4°C. Supernatant was mixed with 2 mL of Ni-NTA agarose (Qiagen) on  
612 a rotary shaker for 1 h at 4°C. Ni-NTA beads with bound MBP-PDF2(START) protein  
613 were washed with 12 mL of ice-cold NaCl solutions. Protein was released from the  
614 beads using a step elution gradient (100-500 mM imidazole). Each step included 3 min  
615 incubations with 0.5 ml elution buffer containing 50 mM sodium phosphate pH 7.4, 500  
616 mM NaCl, 0.5 mM TCEP, 1 mM PMSF, 10% glycerol, and increasing imidazole  
617 concentrations (100-500 mM). Concentration and purity of MBP-PDF2(START) in



618 elution fractions was estimated by SDS-PAGE. Imidazole was removed and proteins  
619 were concentrated using Amicon Ultra 15 mL centrifugal filters having 10 kDa cut-off.  
620 Protein folding was assessed using nano differential scanning fluorimetry (nanoDSF).  
621 Aliquots of purified protein were stored at -20°C in 50 mM sodium phosphate buffer (pH  
622 7.4) supplemented with 500 mM NaCl.

623

## 624 **Liposome preparation**

625 Lipids (Avanti Polar Lipids (Alabaster, AL) were dissolved in chloroform. A total of 5 mg  
626 lipid for each liposome batch was dried in a glass tube under N<sub>2</sub> at 60°C. Residual  
627 chloroform was removed under vacuum overnight. Dried lipid cakes were rehydrated in  
628 500 mM NaCl and 50 mM sodium phosphate (pH 7.4) at room temperature. Small  
629 unilamellar vesicles (SUVs) were formed by sonication using an ultrasonic bath (RK 31,  
630 Bandelin) for 15 min or by extrusion through two layers of polycarbonate membranes  
631 with 50 nm pore size (Nuclepore hydrophilic membrane, Whatman) in a handheld  
632 extruder (Avanti Polar Lipids) or by sonication. Hydrodynamic radii of liposomes were  
633 determined by dynamic light scattering (DLS) to validate successful SUV formation.

634

## 635 **Microscale thermophoresis (MST)**

636 MST measurements were performed using a Monolith NT.115 (NanoTemper).  
637 Capillaries were loaded into the instrument assets in 16-point ligand titrations. MBP-  
638 PDF2(START), MBP-PDF2(START)<sup>L467P</sup> were labeled in 50 mM sodium phosphate  
639 buffer (pH 7.4) supplemented with 500 mM NaCl using Monolith Protein Labeling kit  
640 RED-MALEIMIDE (NanoTemper) according to manufacturer's instructions. To remove  
641 the MBP tag, labeled proteins were incubated with Ni-NTA agarose (Qiagen) on a rotary  
642 shaker for 1 h at RT. Ni-NTA beads were washed with 50 mM sodium phosphate buffer  
643 (pH 7.4) supplemented with 500 mM NaCl prior to release with two rounds of TEV  
644 protease digestion, each with 30 U of TEV for 1 h at RT. Binding was performed in 50  
645 mM sodium phosphate buffer (pH 7.4) supplemented with 500 mM NaCl using standard



646 capillaries. MO.Affinity Analysis software (NanoTemper) was used to analyze binding  
647 affinities from changes in fluorescence. SDS-Test was performed according to the  
648 NanoTemper MST manual to exclude that observed changes in fluorescence were due  
649 to ligand induced changes in protein aggregation.

650

### 651 **RNA extraction and quantitative real-time PCR**

652 Plant samples of ~50 mg were frozen in liquid nitrogen and stored at -80°C prior to RNA  
653 extraction with RNeasy Plant Mini Kit and on-column RNase-Free DNase Set (Qiagen).  
654 Total RNA (0.5 µg) was used as a template for cDNA synthesis with GoScript Reverse  
655 Transcriptase (Promega). qRT-PCR was performed using iTaq SYBR Green Supermix  
656 with the CFX96 Touch Real-Time PCR Detection System (Bio-Rad) with gene-specific  
657 primers (**Supplemental Table 5**). Reactions contained 10 µL SYBR Green Supermix, 1  
658 µL forward and reverse 10 µM primers, and 5 µL cDNA (diluted 5-fold) in 20 µL.  
659 Standard curves were generated from 10-fold dilutions of amplicons for each primer  
660 pair. *ACT7* served as the reference gene. Data represent four biological samples of  
661 seedling shoots with three technical replicates for each biological sample.

662

### 663 **Lipid extraction from plant material**

664 Plant tissues were transferred to hot isopropanol (70°C) with 0.01% BHT (butylated  
665 hydroxytoluene, Sigma) for 15 min followed by cooling to room temperature, and  
666 storage at -80°C prior to processing. Lipid extraction was done with chloroform:  
667 (isopropanol + methanol):water (30:65:3.5). Samples were incubated overnight at 50-  
668 100 rpm at room temperature followed by solvent evaporation. Extracted lipids were  
669 transferred to 2 ml glass vials and dried under N<sub>2</sub>. Based on lipid dry weight and formula  
670 weight of ~800 Da, lipids were eluted at 100 mM with chloroform. 100 µl of a 100 µM  
671 lipid mixture was dried under N<sub>2</sub> and stored at -80°C prior to analysis. Dried lipid  
672 fractions were resuspended in 200 µL UPLC-grade acetonitrile:isopropanol (7:3). A 2 µL

673 sample was loaded per injection. LC/MS analysis was performed as described above.  
674 Raw intensities were normalized to the median of chromatogram intensity.

675

## 676 **Imaging of plants and quantification of trichomes and roots**

677 Seedlings, trichome phenotypes, and EYFP expression were imaged with a Leica M125  
678 fluorescence stereo microscope fitted with a GFP2 filter set, a Leica DFC295 digital  
679 camera with Leica Application Suite 4.1. Trichome quantification was performed as  
680 previously described (Schrick et al., 2014). Root lengths were measured using ImageJ  
681 software analysis of seedling images from BioRad Gel Doc XR+ Imaging System.  
682 Mature plants were imaged with a Canon PowerShot ELPH 350 HS digital camera.

683

## 684 ***In vitro* transcription and translation and electrophoretic mobility shift assay** 685 **(EMSA)**

686 *PDF2* and *ATML1* cDNAs were cloned from pENTR/SD/D-TOPO vectors (ABRC) into  
687 pIX-HALO (ABRC) using Gateway LR Clonase II Enzyme mix (ThermoFisher Scientific).  
688 The K107E mutation in *PDF2* was generated using Q5 Site-Directed Mutagenesis Kit  
689 (New England Biolabs) with described primers (**Supplemental Table 5**). Halo fusion  
690 proteins were produced from 1.5 µg plasmid DNA in a 15 µL reaction using TNT SP6  
691 High-Yield Wheat Germ Protein Expression System (Promega). Protein expression was  
692 confirmed by Western blot with Anti-HaloTag monoclonal Ab (1:2000) (Promega). Cy3-  
693 labeled and unlabeled dsDNA probes were generated with oligonucleotides listed in  
694 **Supplemental Table 5**. Annealing was performed with 25 µM oligonucleotides in 100  
695 mM Tris-Cl (pH 7.5), 1 M NaCl, 10 mM EDTA at 95°C for 2 min, followed by 57°C for 5  
696 min, 37°C for 90 min and 37°C for 2 min. EMSA reactions (20 µL) were prepared as  
697 previously described (Evens et al., 2017), with the following modifications: 6 µl of *in vitro*  
698 translated product was pre-incubated with binding buffer at 28°C for 10 min. Binding  
699 reactions were initiated by adding 200 nM of Cy3-labeled probe, followed by a 20 min  
700 incubation. After electrophoresis in a 0.6 % agarose gel (1X TBE, pH 8.3) at 150 V for 1

701 h at 4°C, the protein-DNA complexes were analysed with a Typhoon Trio Imager (GE  
702 Healthcare) using the 532 nm laser and 580 nm emission filter.

703

#### 704 ***In vivo* protein stability assay**

705 At 5-6 days after germination on P+ or P- agar media, 20-30 seedlings per sample were  
706 transferred to liquid P+ or P- media and growth was continued for 16 h at 23°C under  
707 continuous light. Cycloheximide (Sigma-Aldrich) (400 µM final concentration) or DMSO  
708 was added at 0 h, and harvesting occurred at 0, 2, 5, 10 or 24 h. For proteasome  
709 inhibition experiments, cycloheximide was added together with MG132 (50 µM) (Sigma  
710 Aldrich) or DMSO control at 0 h. Seedling samples were frozen in liquid nitrogen and  
711 stored at -80°C prior to protein extraction. Tissue was homogenized in liquid nitrogen  
712 and hot SDS buffer (8 M urea, 2% SDS, 0.1 M DTT, 20% glycerol, 0.1 M Tris pH 6.8,  
713 0.004% bromophenol blue) was added prior to SDS-PAGE and Western blotting. Anti-  
714 HA (1:10,000; Pierce) or Anti-GFP (1:2000; Roche) served as primary Abs, followed by  
715 Goat Anti-Mouse IgG [HRP] (1:3000; GenScript A00160) as the secondary. Proteins  
716 were detected with SuperSignal West Femto Maximum Sensitivity Substrate  
717 (ThermoFisher Scientific) using Azure 300 chemiluminescence imager (Azure  
718 Biosystems), and blots were stained with Bio-Safe Coomassie Blue G-250 (Bio-Rad) to  
719 monitor protein loading. Band intensities were quantified with ImageJ.

720

#### 721 **Statistical analysis**

722 ***TAP experiments.*** GeneData derived log<sub>2</sub> transformed raw metabolite intensities were  
723 used for statistical analysis (**Supplemental Data Set 1**). MaxQuant derived log<sub>2</sub>  
724 transformed LFQ protein intensities were used for statistical analysis. Unpaired *t*-test  
725 (two-tailed distribution) was used to assess significance. Data are from six (soluble  
726 fraction; experiment 2) samples. Samples represent individual pull-downs, performed in  
727 parallel, using same starting material harvested from two independent lines tagged on  
728 either amino or carboxyl terminus.

729 **Quantitative real-time PCR:** The data represent four biological samples of seedling  
730 shoots from wild type and each mutant, with three technical replicates for each  
731 biological sample. Standard curves were generated for each primer pair and used to  
732 calculate relative units for the experimental samples. All gene expression data were  
733 normalized to *ACT7* (AT5G09810) as the reference gene. Unpaired *t*-tests (two-tailed  
734 distribution) were used to assess significance ( $p < 0.05$ ) for gene expression differences  
735 between wild type and mutant.

736 **Lipidomics:** GeneData derived raw lipid intensities were normalized to the median  
737 intensity of all mass features detected in a given chromatogram and used for statistical  
738 analysis. The data represent 4-5 biological replicates of seedling shoots from wild type  
739 and each of the mutants. For each lipid, averages and standard deviations of lipid  
740 intensities in the 4-5 replicates were determined for the wild-type and mutant samples  
741 (**Supplemental Data Sets 3 and 4**). The fold-changes (mutant/wild-type) were  
742 calculated for each lipid. One-way Anova (Tukey's test) was used for comparison of lipid  
743 classes for  $> 3$  genotypes. Unpaired *t*-test with two-tailed distribution was used to test  
744 significance of changes greater than 2-fold ( $p \leq 0.05$ ). Critical data sets were subjected  
745 to multiple testing for significance in MetaboAnalyst (Xia et al., 2009), correcting for  
746 FDR (**Supplemental Tables 1-4**).

747 **Protein stability assays:** The graphed data represent three or four independent  
748 cycloheximide experiments with whole seedlings. Numerical values for protein levels  
749 were obtained from band intensity quantification and were normalized to the mock zero  
750 (M0) samples, which were designated a value of 1.0. Protein half-life (in h) was  
751 determined by the protein level at a *y*-axis value of 0.5. Unpaired *t*-tests (two-tailed  
752 distribution) were used to assess significance ( $p < 0.05$ ) for protein level differences  
753 between P+ and P- samples at each time point.

754

## 755 **Accession numbers**

756 *Arabidopsis thaliana* HD-Zip IV TFs: PDF2 (At4g04890), GL2 (At1g79840), ATML1  
757 (At4g21750); *Physcomitrium patens* HD-Zip IV TF: PpHDZIV (XP\_024401280.1), *Homo*

758 *sapiens* START domain proteins: StAR/STARD1 (NP\_000340.2); *Homo sapiens*  
759 PCTP/STARD2 (NP\_067036.2); *Arabidopsis thaliana* phospholipid catabolism  
760 enzymes: GDPD1 (At3g02040), GDPD2 (At5g41080), GDPD3 (At5g43300), NPC2  
761 (At2g26870), NPC4 (At3g03530), NPC6 (At3g48610), PLD $\epsilon$  (At1g55180), PLD $\zeta$ 1  
762 (At3g16785), PLD $\zeta$ 2 (At3g05630).

763

## 764 **Supplemental Data**

765 **Supplemental Figure 1.** Lysophosphatidylcholines bind to the START domain of PDF2  
766 *in vitro*.

767 **Supplemental Figure 2.** The *atml1-1;pdf2-1* double mutant exhibits severely altered  
768 lipid composition.

769 **Supplemental Figure 3.** Heat maps illustrate lipidomic profiles in wild type, *pdf2*, *atml1*  
770 and *gl2* seedling shoots under normal growth conditions.

771 **Supplemental Figure 4.** Heat maps illustrate lipidomic profiles in wild type, *pdf2*, *atml1*  
772 and *gl2* mutants under Pi sufficient and limiting conditions.

773 **Supplemental Figure 5.** Volcano plots reveal lipid changes in HD-Zip IV mutants under  
774 Pi sufficient and limiting conditions.

775 **Supplemental Figure 6.** Plant phenotypes from START-domain dependent expression  
776 of PDF2.

777 **Supplemental Figure 7.** Protein stability of PDF2 and GL2 is reduced under Pi  
778 limitation and START domain mutant exhibits enhanced protein instability.

779 **Supplemental Table 1.** Lipidomic changes in *atml1;pdf2-1* vs. wild type.

780 **Supplemental Table 2.** Lipidomic changes in *pdf2-1* vs. wild type under Pi limitation.

781 **Supplemental Table 3.** Lipidomic changes in *pdf2-2* vs. wild type under Pi limitation.

782 **Supplemental Table 4.** Lipidomic changes in *EYFP:pdf2*<sup>ΔSTART</sup> vs. *EYFP:PDF2* under  
783 Pi limitation.

784 **Supplemental Table 5.** Oligonucleotides used in this study.

785 **Supplemental Data Sets 1A and 1B.** TAP lipidomics data for the PDF2 TF from  
786 soluble fractions.

787 **Supplemental Data Set 2A.** List of putative transcriptional target genes from DAP-seq  
788 data for PDF2.

789 **Supplemental Data Set 2B.** GO enrichment for DAP-seq targets of PDF2.

790 **Supplemental Data Set 3A.** Comprehensive lipidomic data from wild-type and *pdf2*,  
791 *atml1;pdf2*, *atml1*, and *gl2* mutants.

792 **Supplemental Data Set 3B.** Maximum normalized comprehensive lipidomic data from  
793 wild-type and *pdf2*, *atml1;pdf2*, *atml1*, and *gl2* mutants.

794 **Supplemental Data Set 4A.** Lipidomic data from wild-type, *pdf2*, *atml1*, and *gl2*  
795 mutants, as well as *EYFP:PDF2*, *EYFP:pdf2*<sup>ΔST</sup>, *EYFP:GL2*, and *EYFP:gl2*<sup>L480P</sup>  
796 transgenic lines in Pi sufficient (P+) and Pi limiting (P-) media.

797 **Supplemental Data Set 4B.** Maximum normalized lipidomic data from wild-type, *pdf2*,  
798 *atml1*, and *gl2* mutants, as well as *EYFP:PDF2*, *EYFP:pdf2*<sup>ΔST</sup>, *EYFP:GL2*, and  
799 *EYFP:gl2*<sup>L480P</sup> transgenic lines in Pi sufficient (P+) and Pi limiting (P-) media.

800 **Supplemental Data Set 4C.** Volcano plot calculations for lipidomic data from wild-type,  
801 *pdf2*, *atml1*, and *gl2* mutants, as well as *EYFP:PDF2*, *EYFP:pdf2*<sup>ΔST</sup>, *EYFP:GL2*, and  
802 *EYFP:gl2*<sup>L480P</sup> transgenic lines in Pi sufficient (P+) and Pi limiting (P-) media.

803 **Supplemental Data Set 5A.** Lipidomics Mass Spectrometry Details: All Detected  
804 Peaks, Putative Metabolite Name Identified: Tandem Affinity Purification Experiment.

805 **Supplemental Data Set 5B.** Lipidomics Mass Spectrometry Details: All Detected Peaks,  
806 Putative Metabolite Name Identified: Mutants Experiment.

807 **Supplemental Data Set 5C.** Lipidomics Mass Spectrometry Details: All Detected  
808 Peaks, Putative Metabolite Name Identified: Pi Limitation Experiment.

809

## 810 **ACKNOWLEDGMENTS**

811 This research was funded by the National Science Foundation (MCB1616818), National  
812 Institute of General Medical Sciences of the National Institute of Health under Award no.  
813 P20GM103418, USDA National Institute of Food and Agriculture Hatch/Multi-State  
814 project 1013013, and Johnson Cancer Research Center at Kansas State  
815 University. This is contribution no. 20-003-J from the Kansas Agricultural Experiment  
816 Station. We thank Anne Michaelis for processing lipidomics samples, Mary Roth for help  
817 with lipid extraction, and Adrienne Roeder, Xuemin Wang, Ruth Welti and Lothar  
818 Willmitzer for valuable input.

819

## 820 **AUTHOR CONTRIBUTIONS**

821 I.W., A.S. and K.S conceived of the experiments and wrote the manuscript. X.H. and  
822 A.K. designed and developed constructs for recombinant expression in *E. coli*. K.S. and  
823 G.L.M. performed RNA extractions and qRT-PCR and G.L.M analyzed DAP-seq data.  
824 I.W. and J.S. performed TAP experiments and analyzed data. I.W. and J.G. purified  
825 recombinant protein and A.S. performed liposome binding experiments. K.S. prepared  
826 protein alignment and structural models. P.K.-B., A.T. and D.K.H. prepared liposomes.  
827 K.S., A.K., T.M., K.A.T. and S.T.P designed and constructed plasmids for DNA binding  
828 and plant assays. T.M. and K.S. performed lipid extractions, DNA binding and  
829 cycloheximide assays. S.T.P. and K.S. conducted root growth assays and EYFP  
830 expression analysis, and K.S. performed trichome quantification.

831

## 832 **REFERENCES**



- 833 **Abe, M., Katsumata, H., Komeda, Y., and Takahashi, T.** (2003). Regulation of shoot  
834 epidermal cell differentiation by a pair of homeodomain proteins in Arabidopsis.  
835 *Development* **130**, 635-643.
- 836 **Alpy, F., and Tomasetto, C.** (2005). Give lipids a START: the StAR-related lipid  
837 transfer (START) domain in mammals. *J. Cell Sci.* **118**, 2791-2801.
- 838 **Alpy, F., Legueux, F., Bianchetti, L., and Tomasetto, C.** (2009). [START domain-  
839 containing proteins: a review of their role in lipid transport and exchange]. *Med*  
840 *Sci (Paris)* **25**, 181-191.
- 841 **Bose, H.S., Sugawara, T., Strauss, J.F., 3rd, Miller, W.L., and International**  
842 **Congenital Lipoid Adrenal Hyperplasia, C.** (1996). The pathophysiology and  
843 genetics of congenital lipoid adrenal hyperplasia. *The New England journal of*  
844 *medicine* **335**, 1870-1878.
- 845 **Cheng, Y., Zhou, W., El Sheery, N.I., Peters, C., Li, M., Wang, X., and Huang, J.**  
846 (2011). Characterization of the Arabidopsis glycerophosphodiester  
847 phosphodiesterase (GDPD) family reveals a role of the plastid-localized  
848 AtGDPD1 in maintaining cellular phosphate homeostasis under phosphate  
849 starvation. *Plant J* **66**, 781-795.
- 850 **Clark, B.J.** (2020). The START-domain proteins in intracellular lipid transport and  
851 beyond. *Mol Cell Endocrinol* **504**, 110704.
- 852 **Clough, S.J., and Bent, A.F.** (1998). Floral dip: a simplified method for Agrobacterium-  
853 mediated transformation of Arabidopsis thaliana. *Plant J* **16**, 735-743.
- 854 **Drissner, D., Kunze, G., Callewaert, N., Gehrig, P., Tamasloukht, M., Boller, T.,**  
855 **Felix, G., Amrhein, N., and Bucher, M.** (2007). Lyso-phosphatidylcholine is a  
856 signal in the arbuscular mycorrhizal symbiosis. *Science* **318**, 265-268.
- 857 **Earley, K.W., Haag, J.R., Pontes, O., Opper, K., Juehne, T., Song, K., and Pikaard,**  
858 **C.S.** (2006). Gateway-compatible vectors for plant functional genomics and  
859 proteomics. *Plant J* **45**, 616-629.
- 860 **Evens, N.P., Buchner, P., Williams, L.E., and Hawkesford, M.J.** (2017). The role of  
861 ZIP transporters and group F bZIP transcription factors in the Zn-deficiency  
862 response of wheat (*Triticum aestivum*). *Plant J* **92**, 291-304.
- 863 **Fluck, C.E., Maret, A., Mallet, D., Portrat-Doyen, S., Achermann, J.C., Leheup, B.,**  
864 **Theintz, G.E., Mullis, P.E., and Morel, Y.** (2005). A novel mutation L260P of the  
865 steroidogenic acute regulatory protein gene in three unrelated patients of Swiss  
866 ancestry with congenital lipoid adrenal hyperplasia. *J Clin Endocrinol Metab* **90**,  
867 5304-5308.
- 868 **Giavalisco, P., Li, Y., Matthes, A., Eckhardt, A., Hubberten, H.M., Hesse, H., Segu,**  
869 **S., Hummel, J., Kohl, K., and Willmitzer, L.** (2011). Elemental formula  
870 annotation of polar and lipophilic metabolites using (13) C, (15) N and (34) S  
871 isotope labelling, in combination with high-resolution mass spectrometry. *Plant J*  
872 **68**, 364-376.
- 873 **Gou, J.Y., Li, K., Wu, K., Wang, X., Lin, H., Cantu, D., Uauy, C., Dobon-Alonso, A.,**  
874 **Midorikawa, T., Inoue, K., Sanchez, J., Fu, D., Blechl, A., Wallington, E.,**  
875 **Fahima, T., Meeta, M., Epstein, L., and Dubcovsky, J.** (2015). Wheat Stripe  
876 Rust Resistance Protein WKS1 Reduces the Ability of the Thylakoid-Associated  
877 Ascorbate Peroxidase to Detoxify Reactive Oxygen Species. *Plant Cell* **27**, 1755-  
878 1770.

- 879 **Hirashima, T., Jimbo, H., Kobayashi, K., and Wada, H.** (2021). A START domain-  
880 containing protein is involved in the incorporation of ER-derived fatty acids into  
881 chloroplast glycolipids in *Marchantia polymorpha*. *Biochem Biophys Res*  
882 *Commun* **534**, 436-441.
- 883 **Hong, Y., Devaiah, S.P., Bahn, S.C., Thamasandra, B.N., Li, M., Welti, R., and**  
884 **Wang, X.** (2009). Phospholipase D epsilon and phosphatidic acid enhance  
885 *Arabidopsis* nitrogen signaling and growth. *Plant J* **58**, 376-387.
- 886 **Kamata, N., Okada, H., Komeda, Y., and Takahashi, T.** (2013a). Mutations in  
887 epidermis-specific HD-ZIP IV genes affect floral organ identity in *Arabidopsis*  
888 *thaliana*. *Plant J*.
- 889 **Kamata, N., Sugihara, A., Komeda, Y., and Takahashi, T.** (2013b). Allele-specific  
890 effects of PDF2 on floral morphology in *Arabidopsis thaliana*. *Plant Signal Behav*  
891 **8**, e27417.
- 892 **Kanno, K., Wu, M.K., Agate, D.S., Fanelli, B.J., Wagle, N., Scapa, E.F., Ukomadu,**  
893 **C., and Cohen, D.E.** (2007). Interacting proteins dictate function of the minimal  
894 START domain phosphatidylcholine transfer protein/StarD2. *J.Biol.Chem.* **282**,  
895 30728-30736.
- 896 **Khosla, A., Paper, J.M., Boehler, A.P., Bradley, A.M., Neumann, T.R., and Schrick,**  
897 **K.** (2014). HD-Zip Proteins GL2 and HDG11 Have Redundant Functions in  
898 *Arabidopsis* Trichomes, and GL2 Activates a Positive Feedback Loop via  
899 MYB23. *Plant Cell* **26**, 2184-2200.
- 900 **Letourneau, D., Lefebvre, A., Lavigne, P., and LeHoux, J.G.** (2015). The binding site  
901 specificity of STARD4 subfamily: Breaking the cholesterol paradigm. *Mol Cell*  
902 *Endocrinol* **408**, 53-61.
- 903 **Letourneau, D., Lorin, A., Lefebvre, A., Frappier, V., Gaudreault, F., Najmanovich,**  
904 **R., Lavigne, P., and LeHoux, J.G.** (2012). StAR-related lipid transfer domain  
905 protein 5 binds primary bile acids. *Journal of Lipid Research* **53**, 2677-2689.
- 906 **Li, M., Welti, R., and Wang, X.** (2006). Quantitative profiling of *Arabidopsis* polar  
907 glycerolipids in response to phosphorus starvation. Roles of phospholipases D  
908 zeta1 and D zeta2 in phosphatidylcholine hydrolysis and  
909 digalactosyldiacylglycerol accumulation in phosphorus-starved plants. *Plant*  
910 *Physiol* **142**, 750-761.
- 911 **Lin, W.D., Liao, Y.Y., Yang, T.J., Pan, C.Y., Buckhout, T.J., and Schmidt, W.** (2011).  
912 Coexpression-based clustering of *Arabidopsis* root genes predicts functional  
913 modules in early phosphate deficiency signaling. *Plant Physiol* **155**, 1383-1402.
- 914 **Luzarowski, M., Wojciechowska, I., and Skirycz, A.** (2018). 2 in 1: One-step Affinity  
915 Purification for the Parallel Analysis of Protein-Protein and Protein-Metabolite  
916 Complexes. *J Vis Exp*, 57720.
- 917 **Luzarowski, M., Kosmacz, M., Sokolowska, E., Jasinska, W., Willmitzer, L., Veyel,**  
918 **D., and Skirycz, A.** (2017). Affinity purification with metabolomic and proteomic  
919 analysis unravels diverse roles of nucleoside diphosphate kinases. *J Exp Bot* **68**,  
920 3487-3499.
- 921 **Mi, H.Y., Muruganujan, A., Ebert, D., Huang, X.S., and Thomas, P.D.** (2019).  
922 PANTHER version 14: more genomes, a new PANTHER GO-slim and  
923 improvements in enrichment analysis tools. *Nucleic Acids Res* **47**, D419-D426.

- 924 **Mongrand, S., Cassagne, C., and Bessoule, J.J.** (2000). Import of lyso-  
925 phosphatidylcholine into chloroplasts likely at the origin of eukaryotic plastidial  
926 lipids. *Plant Physiol* **122**, 845-852.
- 927 **Murashige, T., and Skoog, F.** (1962). A Revised Medium for Rapid Growth and Bio  
928 Assays with Tobacco Tissue Cultures. *Physiologia Plantarum* **15**, 473-497.
- 929 **Nagata, K., Ishikawa, T., Kawai-Yamada, M., Takahashi, T., and Abe, M.** (2021).  
930 Ceramides mediate positional signals in *Arabidopsis thaliana* protoderm  
931 differentiation. *Development* **148**.
- 932 **Nakamura, Y., Awai, K., Masuda, T., Yoshioka, Y., Takamiya, K., and Ohta, H.**  
933 (2005). A novel phosphatidylcholine-hydrolyzing phospholipase C induced by  
934 phosphate starvation in *Arabidopsis*. *J Biol Chem* **280**, 7469-7476.
- 935 **Nobusawa, T., Okushima, Y., Nagata, N., Kojima, M., Sakakibara, H., and Umeda,**  
936 **M.** (2013). Synthesis of very-long-chain fatty acids in the epidermis controls plant  
937 organ growth by restricting cell proliferation. *PLoS Biol* **11**, e1001531.
- 938 **O'Malley, R.C., Huang, S.C., Song, L., Lewsey, M.G., Bartlett, A., Nery, J.R., Galli,**  
939 **M., Gallavotti, A., and Ecker, J.R.** (2016). Cistrome and Epicistrome Features  
940 Shape the Regulatory DNA Landscape. *Cell* **166**, 1598.
- 941 **Ogawa, E., Yamada, Y., Sezaki, N., Kosaka, S., Kondo, H., Kamata, N., Abe, M.,**  
942 **Komeda, Y., and Takahashi, T.** (2015). ATML1 and PDF2 Play a Redundant  
943 and Essential Role in *Arabidopsis* Embryo Development. *Plant Cell Physiol* **56**,  
944 1183-1192.
- 945 **Ohashi, Y., Oka, A., Rodrigues-Pousada, R., Possenti, M., Ruberti, I., Morelli, G.,**  
946 **and Aoyama, T.** (2003). Modulation of phospholipid signaling by GLABRA2 in  
947 root-hair pattern formation. *Science* **300**, 1427-1430.
- 948 **Pant, B.D., Burgos, A., Pant, P., Cuadros-Inostroza, A., Willmitzer, L., and**  
949 **Scheible, W.R.** (2015). The transcription factor PHR1 regulates lipid remodeling  
950 and triacylglycerol accumulation in *Arabidopsis thaliana* during phosphorus  
951 starvation. *J Exp Bot* **66**, 1907-1918.
- 952 **Peterson, K.M., Shyu, C., Burr, C.A., Horst, R.J., Kanaoka, M.M., Omae, M., Sato,**  
953 **Y., and Torii, K.U.** (2013). *Arabidopsis* homeodomain-leucine zipper IV proteins  
954 promote stomatal development and ectopically induce stomata beyond the  
955 epidermis. *Development* **140**, 1924-1935.
- 956 **Ponting, C.P., and Aravind, L.** (1999). START: a lipid-binding domain in StAR, HD-ZIP  
957 and signalling proteins. *Trends Biochem.Sci.* **24**, 130-132.
- 958 **Roderick, S.L., Chan, W.W., Agate, D.S., Olsen, L.R., Vetting, M.W., Rajashankar,**  
959 **K.R., and Cohen, D.E.** (2002). Structure of human phosphatidylcholine transfer  
960 protein in complex with its ligand. *Nat.Struct.Biol.* **9**, 507-511.
- 961 **Roeder, A.H., Cunha, A., Ohno, C.K., and Meyerowitz, E.M.** (2012). Cell cycle  
962 regulates cell type in the *Arabidopsis* sepal. *Development* **139**, 4416-4427.
- 963 **Rombola-Caldentey, B., Rueda-Romero, P., Iglesias-Fernandez, R., Carbonero, P.,**  
964 **and Onate-Sanchez, L.** (2014). *Arabidopsis* DELLA and two HD-ZIP  
965 transcription factors regulate GA signaling in the epidermis through the L1 box  
966 cis-element. *Plant Cell* **26**, 2905-2919.
- 967 **Roy, A., Kucukural, A., and Zhang, Y.** (2010). I-TASSER: a unified platform for  
968 automated protein structure and function prediction. *Nat Protoc* **5**, 725-738.

- 969 **Rubio, V., Linhares, F., Solano, R., Martin, A.C., Iglesias, J., Leyva, A., and Paz-**  
970 **Ares, J.** (2001). A conserved MYB transcription factor involved in phosphate  
971 starvation signaling both in vascular plants and in unicellular algae. *Genes Dev*  
972 **15**, 2122-2133.
- 973 **Savaldi-Goldstein, S., Peto, C., and Chory, J.** (2007). The epidermis both drives and  
974 restricts plant shoot growth. *Nature* **446**, 199-202.
- 975 **Schrick, K., Nguyen, D., Karlowski, W.M., and Mayer, K.F.** (2004). START  
976 lipid/sterol-binding domains are amplified in plants and are predominantly  
977 associated with homeodomain transcription factors. *Genome Biol* **5**, R41.
- 978 **Schrick, K., Bruno, M., Khosla, A., Cox, P.N., Marlatt, S.A., Roque, R.A., Nguyen,**  
979 **H.C., He, C., Snyder, M.P., Singh, D., and Yadav, G.** (2014). Shared functions  
980 of plant and mammalian StAR-related lipid transfer (START) domains in  
981 modulating transcription factor activity. *BMC Biol* **12**, 70.
- 982 **Scott, S.P., Teh, A., Peng, C., and Lavin, M.F.** (2002). One-step site-directed  
983 mutagenesis of ATM cDNA in large (20kb) plasmid constructs. *Hum Mutat* **20**,  
984 323.
- 985 **Sluchanko, N.N., Tugaeva, K.V., Faletrov, Y.V., and Levitsky, D.I.** (2016). High-yield  
986 soluble expression, purification and characterization of human steroidogenic  
987 acute regulatory protein (StAR) fused to a cleavable Maltose-Binding Protein  
988 (MBP). *Protein expression and purification* **119**, 27-35.
- 989 **Su, Y., Li, M., Guo, L., and Wang, X.** (2018). Different effects of phospholipase Dzeta2  
990 and non-specific phospholipase C4 on lipid remodeling and root hair growth in  
991 *Arabidopsis* response to phosphate deficiency. *Plant J* **94**, 315-326.
- 992 **Takada, S., Takada, N., and Yoshida, A.** (2013). ATML1 promotes epidermal cell  
993 differentiation in *Arabidopsis* shoots. *Development* **140**, 1919-1923.
- 994 **Tillman, M.C., Imai, N., Li, Y., Khadka, M., Okafor, C.D., Juneja, P., Adhiyaman, A.,**  
995 **Hagen, S.J., Cohen, D.E., and Ortlund, E.A.** (2020). Allosteric regulation of  
996 thioesterase superfamily member 1 by lipid sensor domain binding fatty acids  
997 and lysophosphatidylcholine. *Proc Natl Acad Sci U S A* **117**, 22080-22089.
- 998 **Van Leene, J., Eeckhout, D., Persiau, G., Van De Slijke, E., Geerinck, J., Van**  
999 **Isterdael, G., Witters, E., and De Jaeger, G.** (2011). Isolation of transcription  
1000 factor complexes from *Arabidopsis* cell suspension cultures by tandem affinity  
1001 purification. *Methods Mol Biol* **754**, 195-218.
- 1002 **Xia, J., Psychogios, N., Young, N., and Wishart, D.S.** (2009). MetaboAnalyst: a web  
1003 server for metabolomic data analysis and interpretation. *Nucleic Acids Res* **37**,  
1004 W652-660.
- 1005 **Yang, B., Li, M., Phillips, A., Li, L., Ali, U., Li, Q., Lu, S., Hong, Y., Wang, X., Guo, L.**  
1006 (2021). Nonspecific phospholipase C4 hydrolyzes phosphosphingolipids and  
1007 sustains plant root growth during phosphate deficiency. *Plant Cell*, 1-15.
- 1008 **Yang, J., and Zhang, Y.** (2015). I-TASSER server: new development for protein  
1009 structure and function predictions. *Nucleic Acids Res* **43**, W174-181.

1010

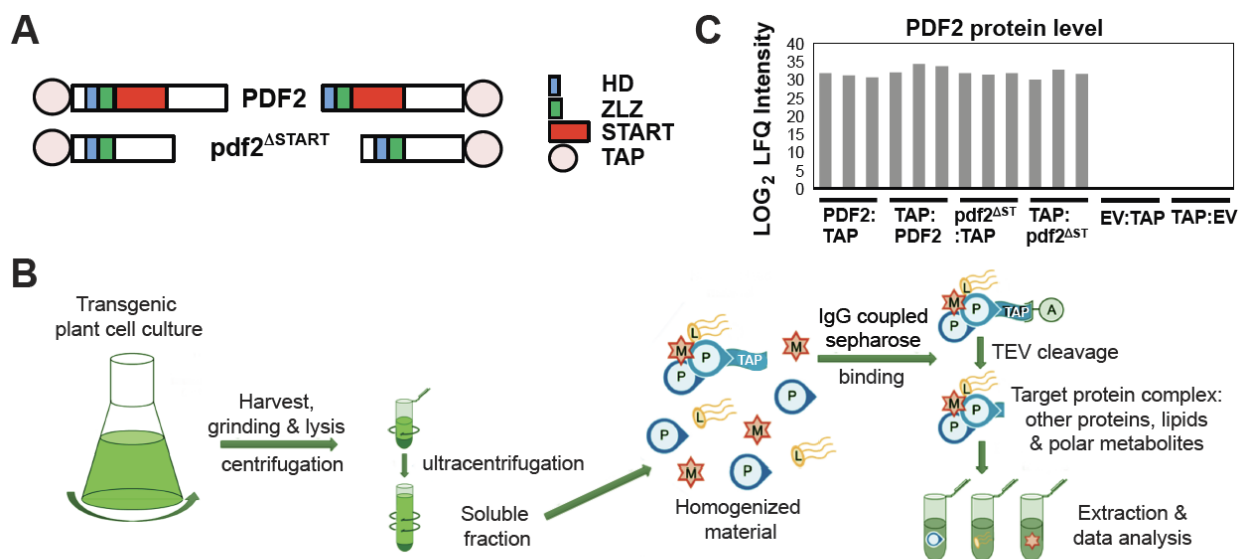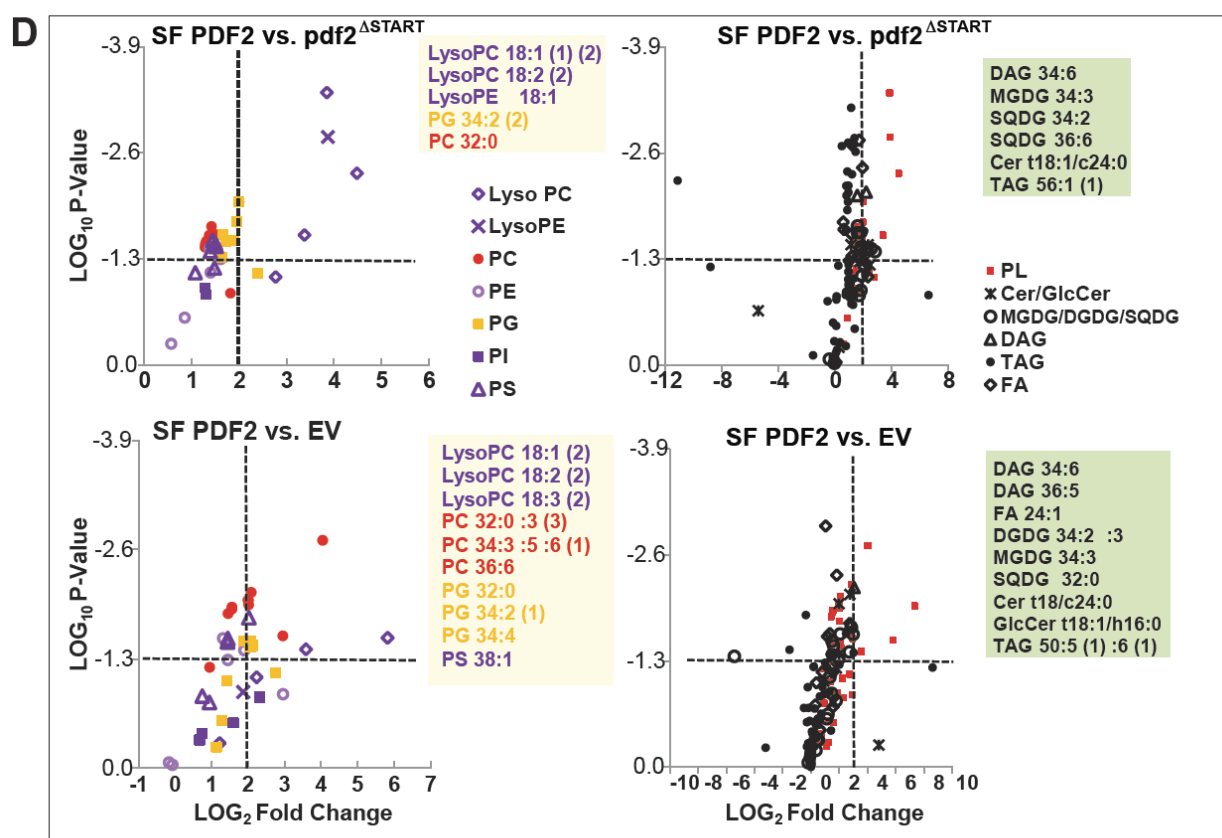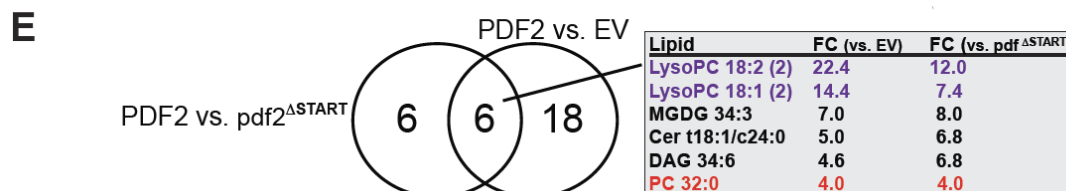



1012 **Figure 1. PDF2 START binds lysophosphatidylcholines in *Arabidopsis* cell**  
1013 **cultures.**

1014  
1015 **(A)** PDF2 and pdf2<sup>ΔSTART</sup> proteins used for tandem affinity purification (TAP)  
1016 experiments. HD, Homeodomain; ZLZ, Zipper Loop Zipper, a plant-specific leucine  
1017 zipper; START domain.

1018 **(B)** Schematic of TAP protocol with *Arabidopsis* cell cultures.

1019 **(C)** PDF2 protein quantification from eluates obtained from TAP. Mass-spectrometry  
1020 based proteomics revealed similar label-free quantification (LFQ) intensities for cell lines  
1021 expressing full-length PDF2 and mutant pdf2<sup>ΔSTART</sup>. No signal was detected for empty  
1022 vector (EV) lines.

1023 **(D)** START domain of PDF2 recruits lysophosphatidylcholines. Lipids were extracted  
1024 from TAP eluates from PDF2, pdf2<sup>ΔSTART</sup> and EV lines and analyzed by LC/MS. Volcano  
1025 plots depict log<sub>2</sub>-fold changes (FC) between PDF2 and either pdf2<sup>ΔSTART</sup> or EV on x axis  
1026 versus significance (P-values, unpaired *t*-test) on y axis for means of 6 replicates.  
1027 Horizontal dotted line indicates p = 0.05. Vertical dotted line marks a ratio of 4. SF,  
1028 soluble fraction. Volcano plots of phospholipid (PL) changes in phosphatidylcholine  
1029 (PC), phosphatidylethanolamine (PE), phosphatidylglycerol (PG), phosphatidylinositol  
1030 (PI), and phosphatidylserine (PS) (left). Volcano plots of lipid profiles represent values  
1031 for PL, ceramides (Cer), glucosylceramides (GlcCer), digalactosyldiacylglycerols  
1032 (DGDG), monogalactosyldiacylglycerols (MGDG), sulfoquinovosyl diacylglycerols  
1033 (SQDG), diacylglycerols (DAG), triacylglycerols (TAG), and fatty acids (FA) (right). Lipid  
1034 interactors are shown in boxes (4-FC, *t*-test, p < 0.05).

1035 **(E)** Venn diagram illustrates lipid interactors for PDF2 but not for pdf2<sup>ΔSTART</sup> or EV. See  
1036 **Supplemental Data Set 1.**

1037

1038

1039

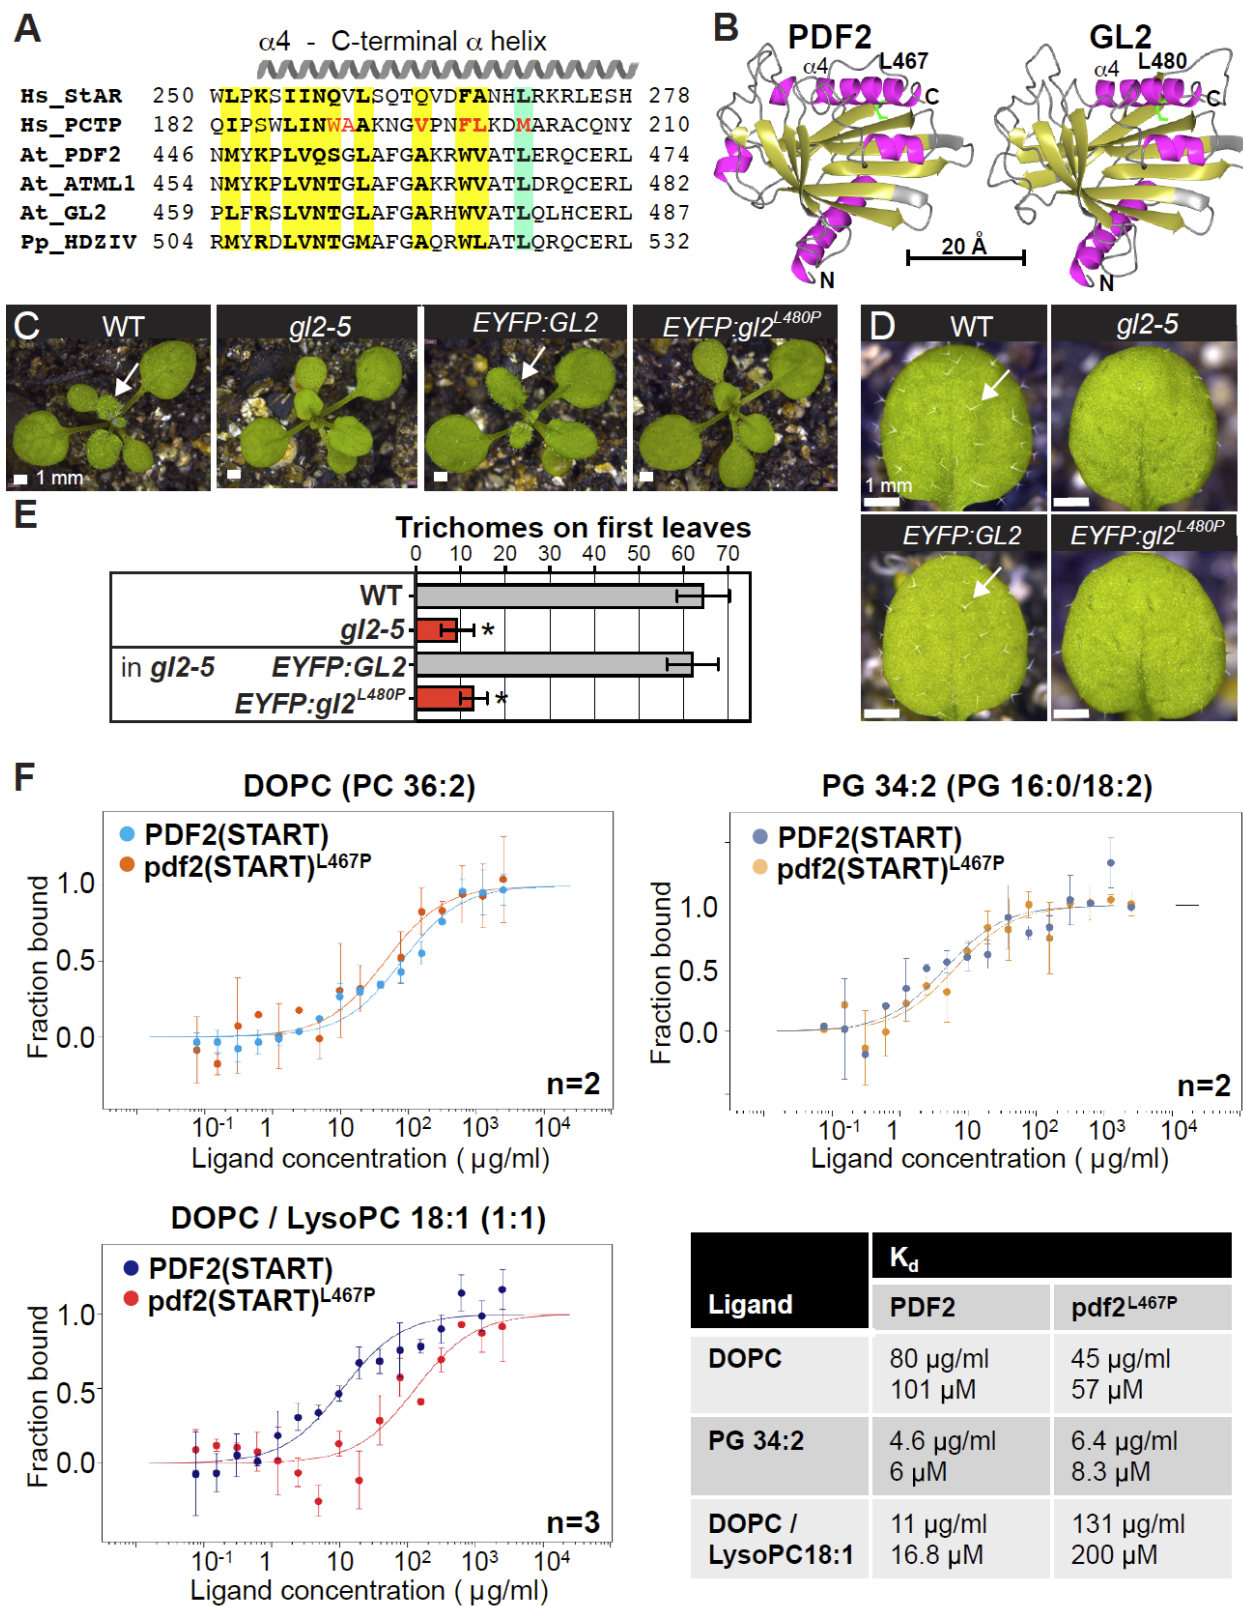



1041 **Figure 2. Conserved ligand contact site is required for activity and PDF2 START**  
1042 **domain binds lysophosphatidylcholine *in vitro*.**

1043 **(A)** Alignment of C-terminal  $\alpha$ -helix of START from human (Hs) StAR and PCTP, and  
1044 HD-Zip IV TFs from *Arabidopsis thaliana* (At) and *Physcomitrium patens* (Pp).  
1045 Conserved amino acids (bold, yellow); conserved Leu/Met (green). Ligand contact sites  
1046 as determined from PCTP-PC co-crystal (Roderick et al., 2002) (red).

1047 **(B)** Structural homology models of PDF2 and GL2 START domains generated in I-  
1048 TASSER (Roy et al., 2010; Yang and Zhang, 2015) reveal conserved Leu (green) in C-  
1049 terminal  $\alpha$ -helix.

1050 **(C)** Rosettes, and **(D)** first leaves expressing *proGL2:EYFP:GL2* versus  
1051 *proGL2:EYFP:gl2<sup>L480P</sup>* in *gl2-5* background in comparison to wild type (WT) and *gl2-5*.  
1052 Normal trichomes on leaves (arrows).

1053 **(E)** Quantification of leaf trichomes: *gl2<sup>L480P</sup>* mutants exhibit trichome defects similar to  
1054 *gl2-5*. Error bars indicate SD for  $n \geq 20$  plants. Significant differences for *gl2<sup>L480P</sup>* versus  
1055 WT (unpaired t-test): \* $p < 1.0E-10$ .

1056 **(F)** Recombinant PDF2 START domain binds to lysophosphatidylcholines. Binding of  
1057 purified PDF2(START) and pdf2(START)<sup>L467P</sup> to liposomes prepared using indicated  
1058 lipids, measured by microscale thermophoresis (MST). Data represented as mean  $\pm$  SD  
1059 of  $n = 2-3$  independent titrations. Binding curves were used to calculate binding affinities  
1060 expressed as dissociation constants  $K_d$ . See also **Supplemental Figure 1**.

1061

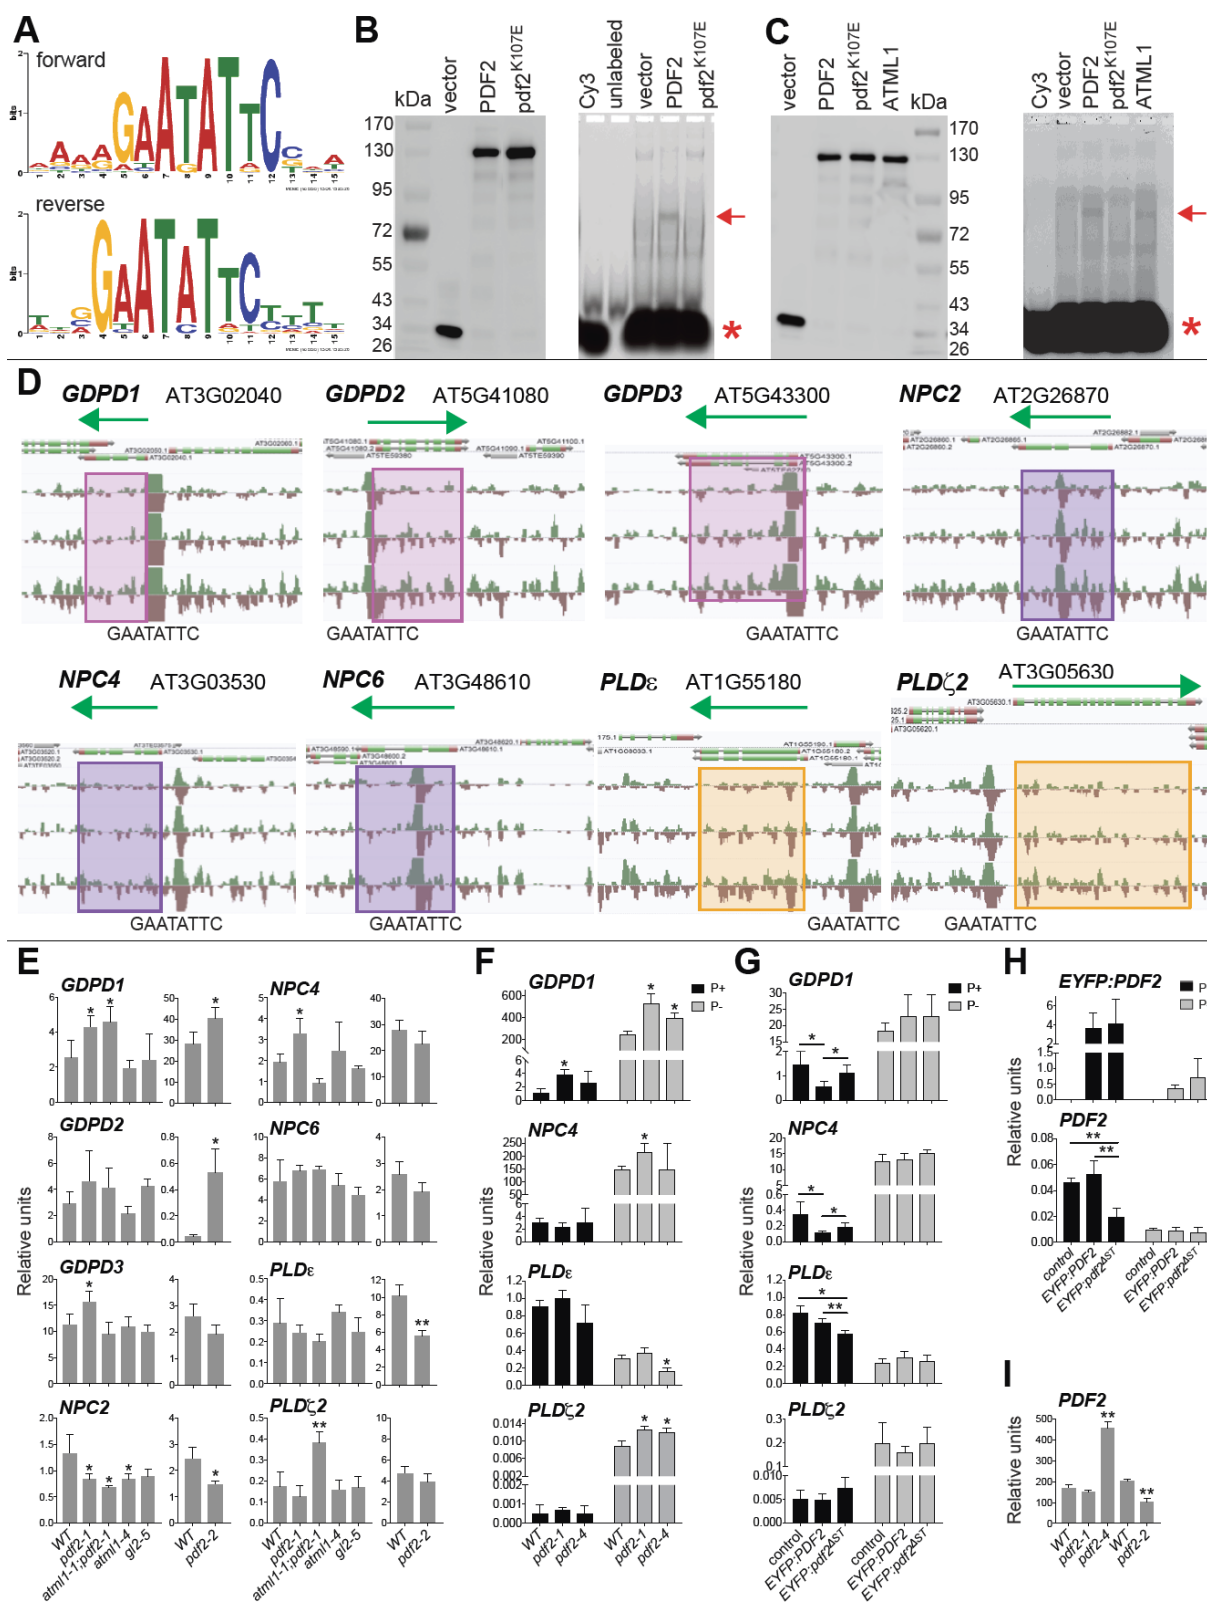

1062

1063 **Figure 3. PDF2 binds a Pi response element and transcriptional targets include**  
1064 **phospholipid catabolic genes.**

1065 **(A)** Octamer motifs from DAP-seq data (O'Malley et al., 2016) for PDF2 exhibit  
1066 consensus with P1BS (GNATATNC).

1067 **(B and C)** EMSA shows band shift for Halo:PDF2 (arrow), but not for HD mutant  
1068 pdf2<sup>K107E</sup>. Asterisk indicates Cy3-labeled probe containing GAATATTC motif. Western  
1069 blot with anti-Halo Ab detects Halo-tagged proteins used for EMSA (left). **(C)** EMSA  
1070 shows band shift for Halo:ATML1 (arrow).

1071 **(D)** Phospholipid catabolic genes show DAP-seq peaks that map to GAATATTC on  
1072 forward (green) and reverse (brown) strands. Green arrows indicate length and direction  
1073 of transcript. Shaded boxes mark target gene classification: *GDPD* (pink), *NPC* (purple),  
1074 *PLD* (peach).

1075 **(E)** *PDF2* is required for normal mRNA expression of several phospholipid catabolic  
1076 genes. qRT-PCR with cDNA from 12 d-old (WT, *pdf2-1*, *atml1-1*; *pdf2-1*, *atml1-4*, *gl2-5*)  
1077 or 15 d-old (WT, *pdf2-2*) seedling shoots.

1078 **(F-H)** qRT-PCR with cDNA from 14-d-old seedling shoots under Pi sufficiency (P+) or  
1079 limitation (P-). **(F)** *PDF2* is required for normal gene expression of gene targets under Pi  
1080 limitation. **(G)** Ectopic expression of *EYFP:PDF2* results in downregulation of *GDPD1*  
1081 and *NPC4*, but upregulation of *PLDε* in comparison to *EYFP:pdf2<sup>ΔST</sup>*. **(H)** The  
1082 *EYFP:PDF2* and *EYFP:pdf2<sup>ΔST</sup>* lines display similar transcript levels of *EYFP* transgene.  
1083 Mutant *EYFP:pdf2<sup>ΔST</sup>* results in downregulation of endogenous *PDF2*. **(I)** *PDF2* mRNA  
1084 is upregulated in *pdf2-4* and downregulated in *pdf2-2*.

1085 **(E-I)** Data represent means of n = 4 biological replicates normalized to reference gene  
1086 *ACT7*. Error bars indicate SD. Significant differences from WT or control for >3  
1087 genotypes determined by one-way ANOVA, and for 2 genotypes, unpaired *t*-test: \*p <  
1088 0.05 and \*\*p ≤ 0.0001. See **Supplemental Data Set 2**.

1089

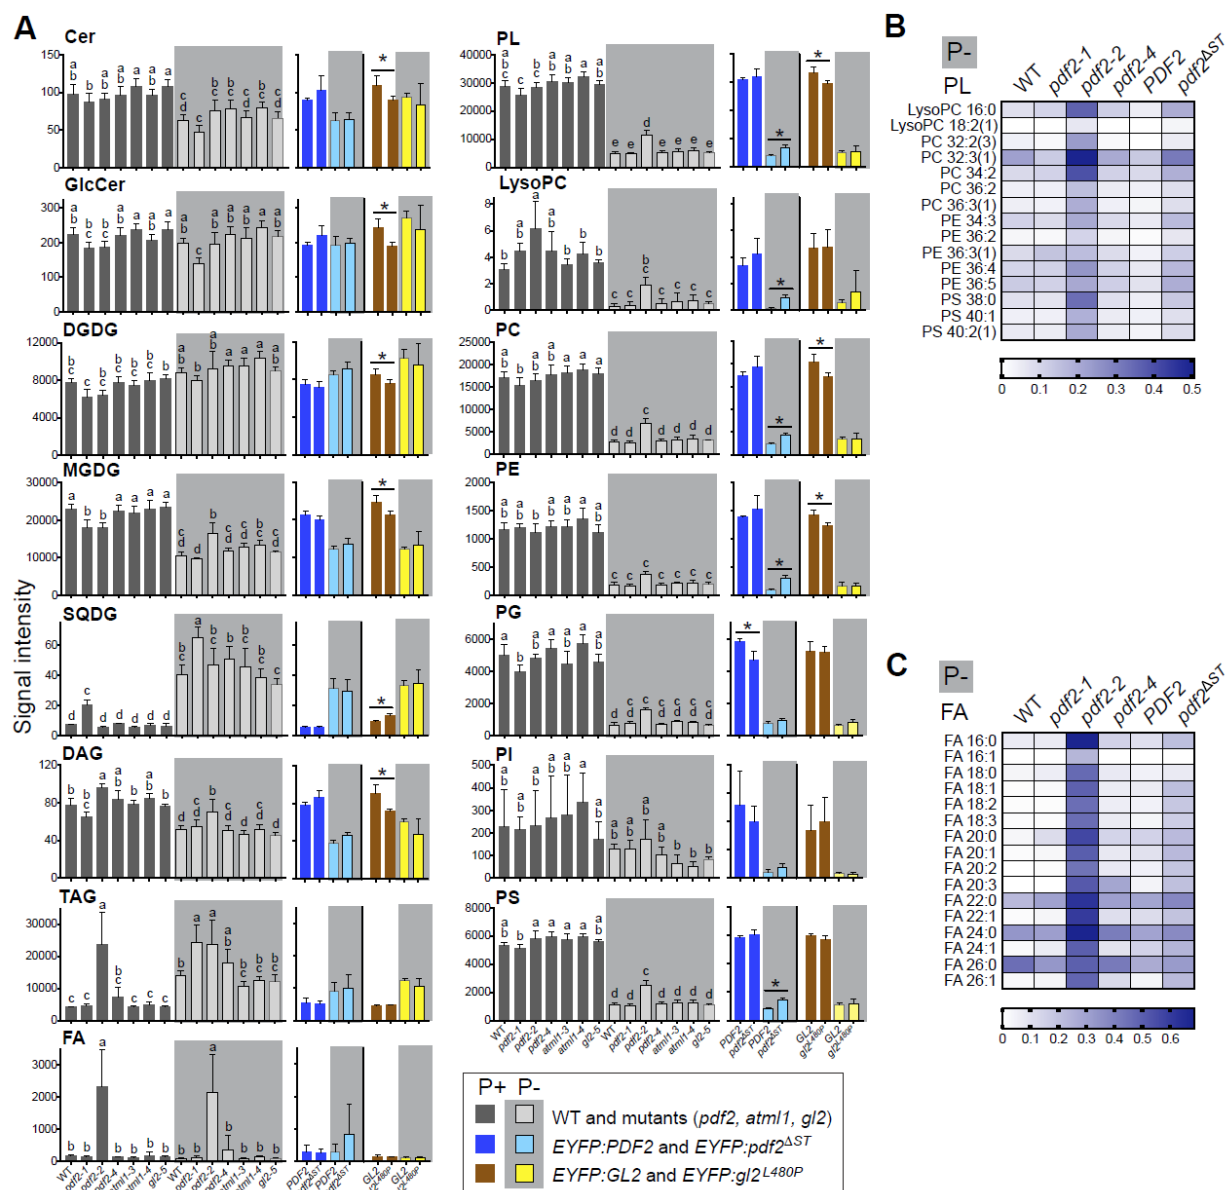

1090

1091 **Figure 4. Lipidomic profiling reveals elevated phospholipid levels in *pdf2-2* and**  
 1092 ***pdf2<sup>ΔST</sup>* mutants under Pi limitation.**

1093 **(A-C)** Lipids were extracted from 14-d-old seedling shoots from wild-type (WT), *pdf2*,  
 1094 *atml1*, and *gl2*, as well as *EYFP:PDF2*, *EYFP:pdf2<sup>ΔST</sup>*, *EYFP:GL2* and *EYFP:gl2<sup>L480P</sup>*  
 1095 transgenic lines, followed by LC-MS. Data represent 4-5 biological replicates for each  
 1096 genotype under Pi sufficiency (P+) or limitation (P-). Parentheses next to lipid species  
 1097 indicate alternative combinations of fatty acid chains corresponding to nomenclature for  
 1098 numbers of carbons and double bonds.

1100 **(A)** Signal intensities are indicated for means of lipid classes. Error bars indicate SD.  
1101 Significant differences between >3 genotypes are marked by letters (one-way ANOVA,  
1102 Tukey's test, and between 2 genotypes by unpaired *t*-test: \**p* < 0.05) and \*\**p* ≤ 0.0001.  
1103 **(B and C)** Heat maps of selected phospholipids (PL) **(B)** and all FA **(C)** levels under Pi  
1104 limitation in WT and *pdf2* mutants in comparison to *EYFP:PDF2* and *EYFP:pdf2<sup>ΔST</sup>*.  
1105 Only phospholipid species with significant increases in *pdf2<sup>ΔST</sup>* after FDR analysis are  
1106 shown in **(Supplemental Table 3)** the PL heat map. Minimum and maximum values  
1107 normalized to 0.0 and <1.0, respectively, for visualization purposes. See **Supplemental**  
1108 **Figures 2-5 and Supplemental Data Sets 3 and 4.**

1109

1110

1111

1112

1113

1114

1115

1116

1117

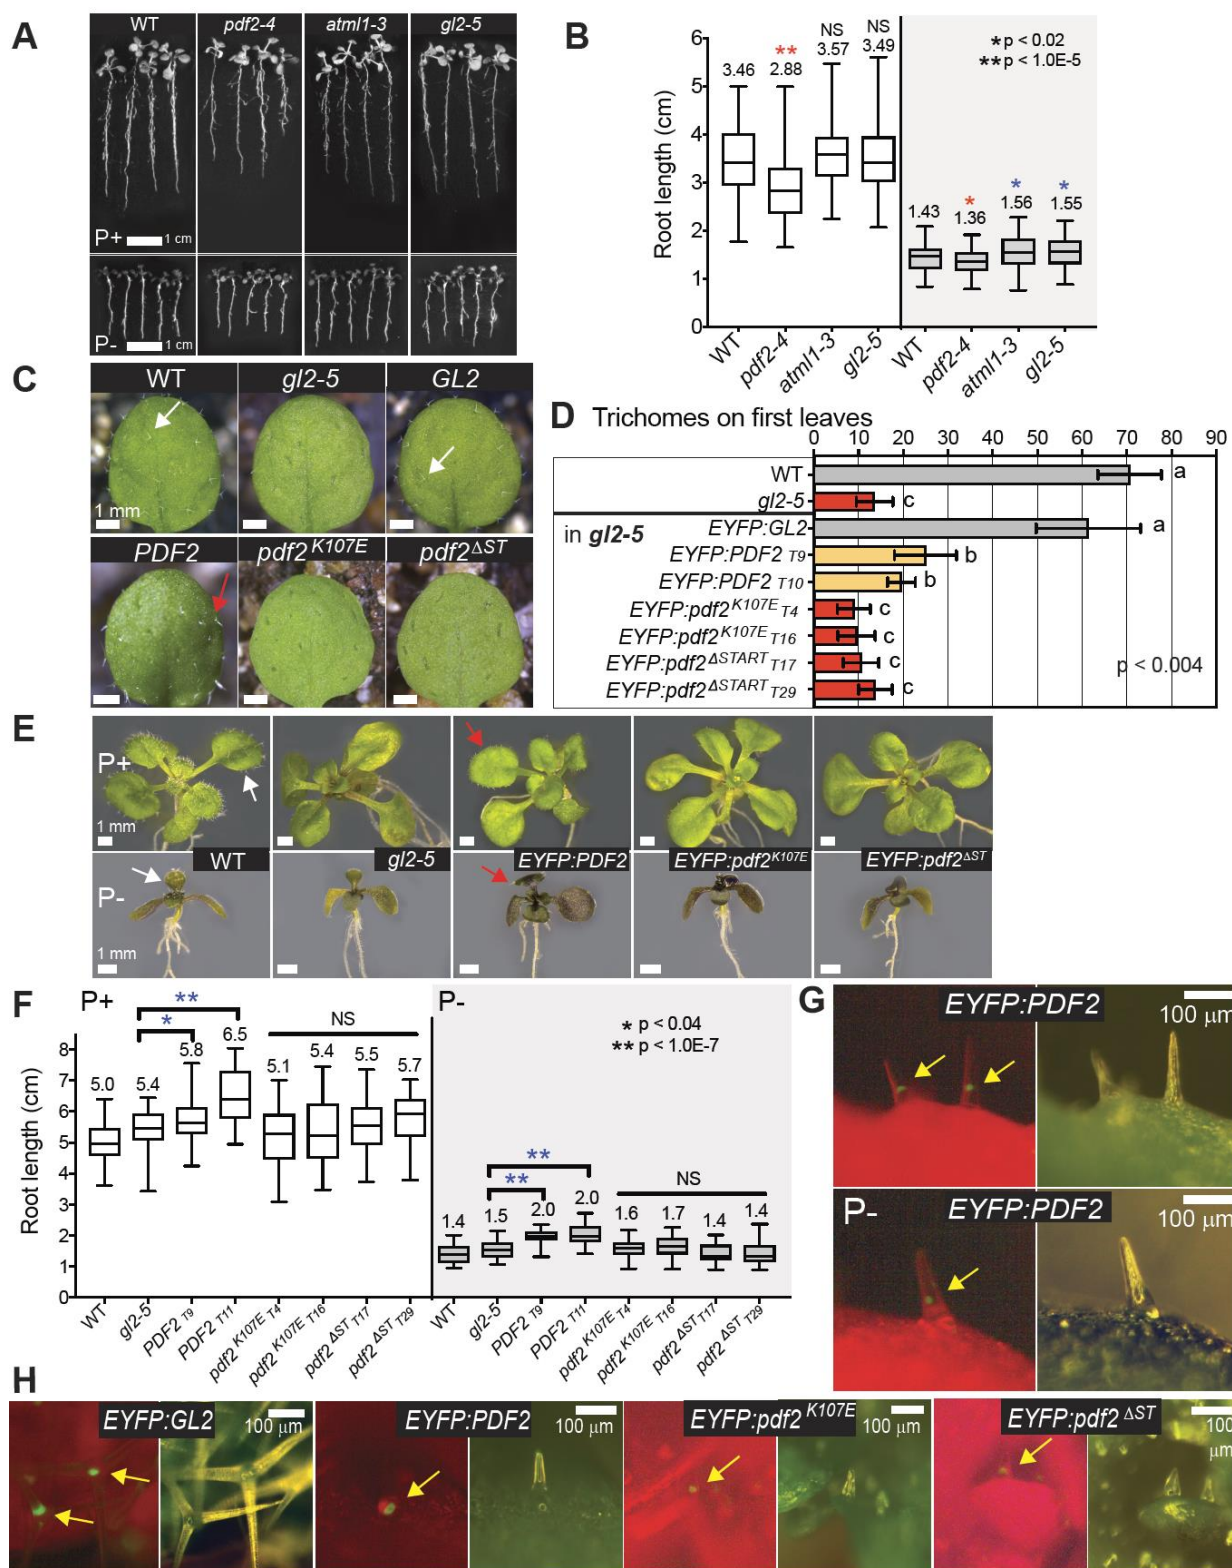



1119 **Figure 5. START domain-dependent expression of PDF2 drives elongation**  
1120 **growth.**

1121 **(A)** Seedlings from wild type (WT), and HD-Zip IV null mutants were grown under Pi  
1122 sufficiency (P+) or limitation (P-) for 14 d. Size bars = 1.0 cm.

1123 **(B)** Root lengths for seedlings from each genotype. Each box plot represents  $n > 130$   
1124 seedlings from 4-5 independent experiments. Horizontal lines denote median. Vertical  
1125 lines indicate minimum and maximum values. Means are reported above box plots.  
1126 Significant decreases (red) or increases (blue) from WT (unpaired *t*-test): \* $p < 0.02$  or  
1127 \*\* $p < 0.00001$ .

1128 **(C)** Ectopic expression of PDF2 results in gain-of-function trichome phenotype that is  
1129 HD and START domain dependent. First leaves of WT and *gl2-5* plants in comparison  
1130 to *proGL2:EYFP:GL2*, *proGL2:EYFP:PDF2*, *proGL2:EYFP:pdf2<sup>K107E</sup>* and  
1131 *proGL2:EYFP:pdf2<sup>ΔST</sup>* in *gl2-5* background. Arrows indicate normal (white) and  
1132 abnormal (red) leaf trichomes. Size bars = 1 mm. See also **Supplemental Figure 6.**

1133 **(D)** Quantification of leaf trichomes. Error bars indicate SD for  $n \geq 20$  plants (unpaired *t*-  
1134 test): \* $p < 0.00001$ ).

1135 **(E)** Phenotypes of 14-d-old seedlings under P+ or P- conditions. Arrows indicate normal  
1136 (white) and abnormal (red) leaf trichomes. Size bars = 1 mm.

1137 **(F)** Ectopic expression of PDF2 drives root elongation. Quantification of root lengths for  
1138 seedlings shown in **(E)**. Each box plot represents  $n \geq 29$  seedlings from two  
1139 independent experiments. Two independent transformants (T#) were analyzed for each  
1140 transgene. Significant increases (blue) to control (unpaired *t*-test): \* $p < 0.04$  or \*\* $p <$   
1141  $1.0E-7$ .

1142 **(G and H)** Epifluorescence (left) with matching light images (right) of leaf trichomes from  
1143 14-d-old seedlings. Size bars = 100  $\mu\text{m}$ . **(G)** EYFP:PDF2 is nuclear localized under P+  
1144 and P- conditions (arrows). **(H)** EYFP-tagged wild-type and mutant proteins are nuclear  
1145 localized (arrows).

1146

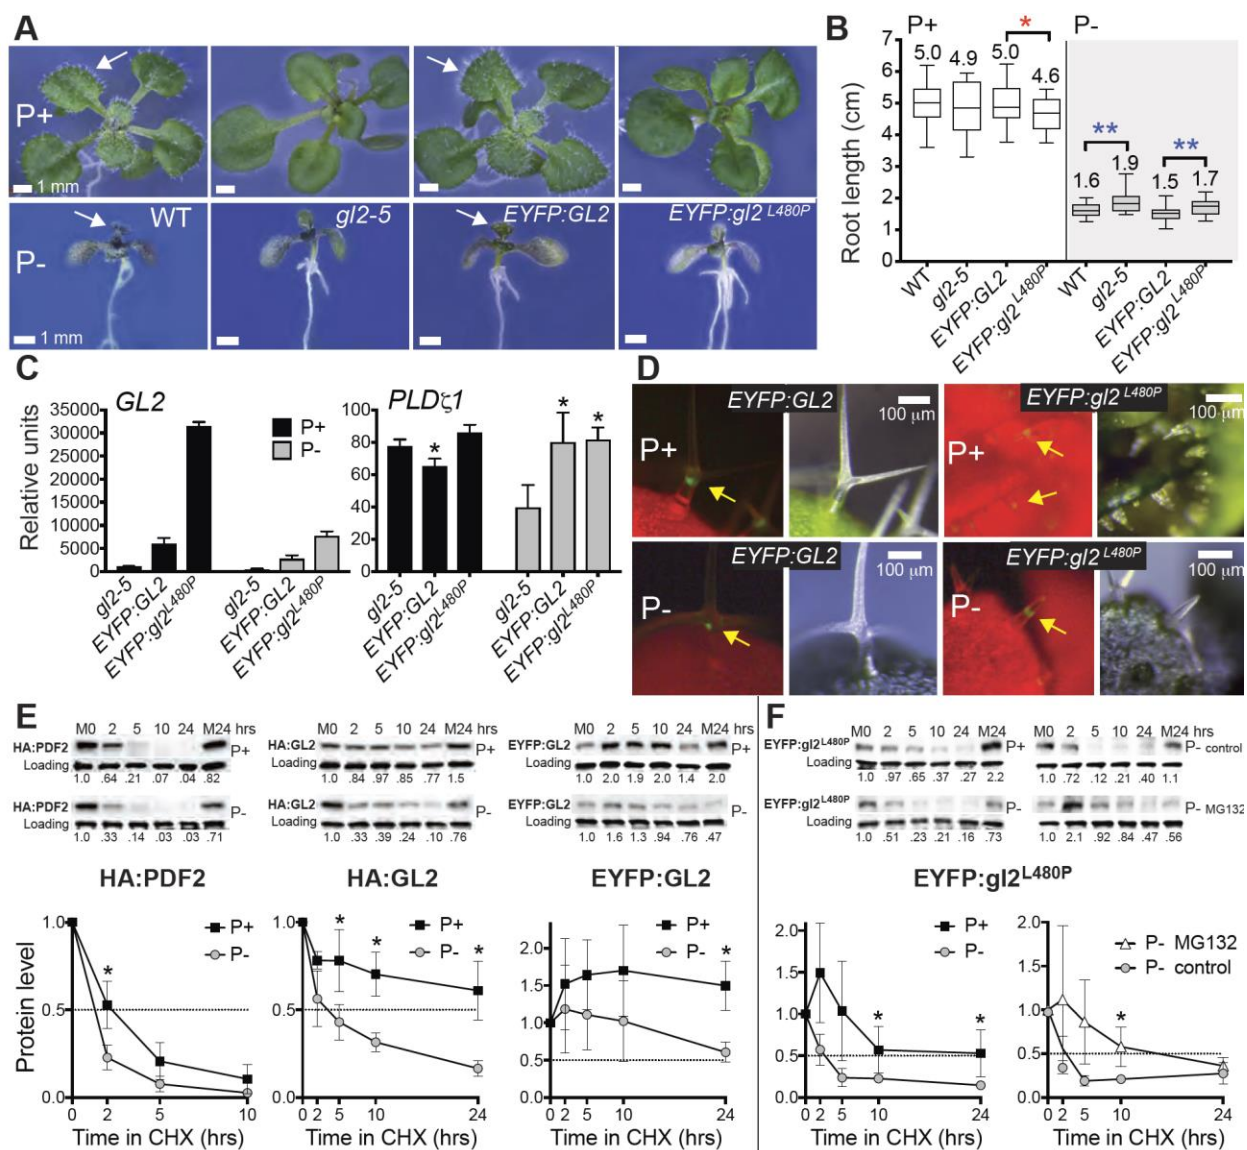

1147

1148 **Figure 6. START mutant L480P affects root elongation, target gene repression,**  
 1149 **and protein stability of GL2.**

1150 **(A)** Phenotypes of 14-d-old seedlings from wild type (WT), *gl2-5*, *proGL2:EYFP:GL2*  
 1151 and *proGL2:EYFP:gl2<sup>L480P</sup>* (in *gl2-5* background) under Pi sufficiency (P+) or limitation  
 1152 (P-). Normal leaf trichomes (arrows). Size bars = 1 mm.

1153 **(B)** Root lengths for  $n \geq 21$  seedlings. Significant decrease (red) or increase (blue) to  
 1154 control (unpaired *t*-test): \* $p < 0.04$  or \*\* $p < 0.002$ .

1155 **(C)** qRT-PCR with cDNA from 14-d-old seedling shoots under P+ or P- conditions,  
1156 normalized to reference gene *ACT7*. Both WT and mutant lines express *GL2/gl2*  
1157 transcript. *EYFP:GL2* but not *EYFP:gl2<sup>L480P</sup>* exhibits repression of *PLD $\zeta$ 1* under P+  
1158 conditions. Significant difference to *gl2-5* (unpaired *t*-test): \**p* < 0.05.

1159 **(D)** Epifluorescence (left) with matching light images (right) of leaf trichomes from 14-d-  
1160 old seedlings. *EYFP:GL2* and *EYFP:gl2<sup>L480P</sup>* are nuclear localized (arrows) under P+  
1161 and P- conditions. Size bars = 100  $\mu$ m.

1162 **(E)** Protein stability of PDF2 and GL2 is reduced under Pi limitation. Seedlings were  
1163 grown on P+ or P- media for 5-6 days, followed by cycloheximide (400  $\mu$ M) treatment  
1164 for 24 h. Western blot with anti-HA or -GFP antibodies, followed by Coomassie blue  
1165 staining for loading controls. Top (P+) and bottom (P-) rows are from the same blot. M0  
1166 and M24, DMSO mock treatments at 0 and 24 h. Each blot is representative of *n* = 3-4  
1167 independent experiments.

1168 **(F)** In comparison to GL2 **(E)**, *gl2<sup>L480P</sup>* exhibited a shorter half-life that was enhanced  
1169 under Pi limitation. MG132 (50  $\mu$ M) treatment restored *gl2<sup>L480P</sup>* stability. **(E and F)**  
1170 Protein quantification, with values normalized to M0, are graphed beneath Western  
1171 blots. Intersection with dotted line (0.5) denotes protein half-life. Error bars indicate SD.  
1172 Significant differences (unpaired *t*-test): \**p*  $\leq$  0.05. See also **Supplemental Figure 7**.

1173

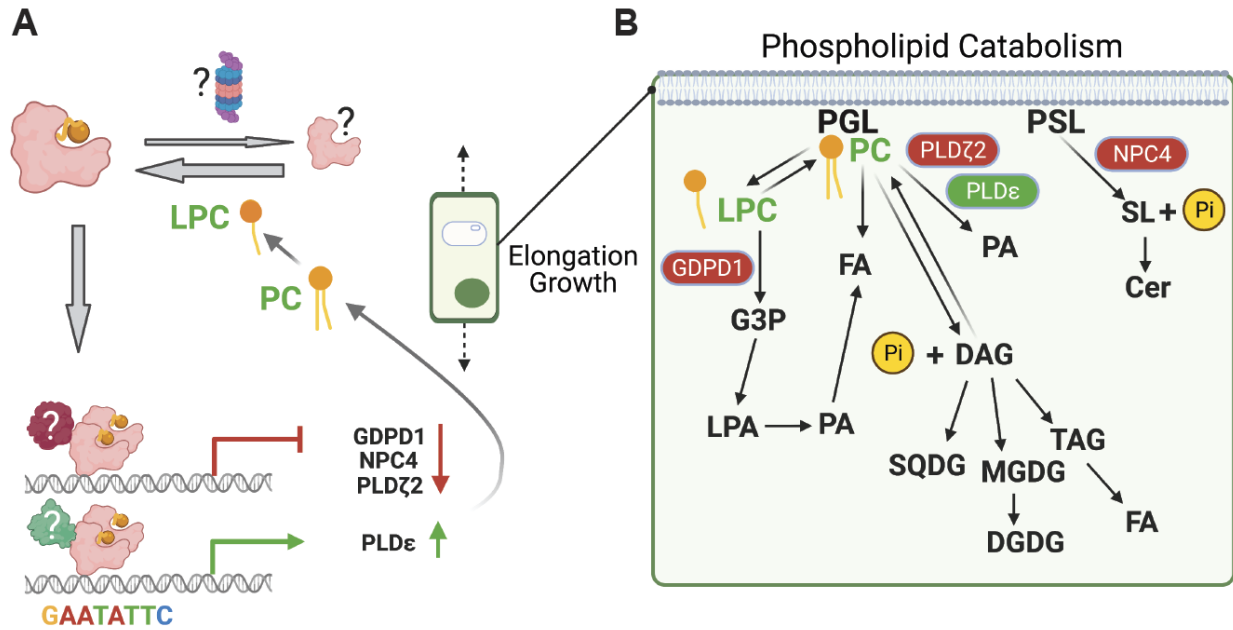

1174

1175 **Figure 7. Model for the role of PDF2 as a lipid sensor.**

1176 **(A)** The START domain of PDF2 binds a lipid ligand, resulting in either stabilization or  
 1177 destabilization of the protein, possibly via the 26S proteasome. In the illustrated  
 1178 scenario, lysophosphatidylcholine binding results in stabilized TF that dimerizes and  
 1179 binds to the P1BS palindrome upstream of phospholipid catabolic genes. Negative or  
 1180 positive regulation of gene expression occurs through interaction with an unknown  
 1181 corepressor or coactivator, respectively. This gene regulation drives the maintenance of  
 1182 membrane phospholipids in epidermal cells undergoing elongation growth, even under  
 1183 Pi limitation.

1184 **(B)** Lysophosphatidylcholine plays a central role in phospholipid catabolism.  
 1185 Phosphoglycerolipids (PGL) and phosphosphingolipids (PSL) of the plasma membrane  
 1186 are major stores of Pi in the cell. The GDPD, NPC4, and PLDζ2 enzymatic steps are  
 1187 transcriptionally repressed by PDF2. In contrast, PLDε enzyme activity, which is  
 1188 associated with enhanced root growth and biomass accumulation (Hong et al., 2009), is  
 1189 promoted by PDF2 transcriptional activation. These events result in phospholipid

1190 accumulation and production of lysophosphatidylcholine, which in turn binds PDF2 to  
1191 positively regulate its activity (**A**). This figure was created with BioRender.com.

1192

1193

1194
